# Supplementary material for: Combining population genomics and forward simulations to investigate stocking impacts: A case study of Muskellunge (Esox masquinongy) from the St. Lawrence River basin
Source: PubMed Central journal article supplement (PMC6503833; doi:10.1111/eva.12765), 2019-01-30
Supplement: EVA-12-902-s001.pdf [file EVA-12-902-s001.pdf]

## **Supplementary Methods and results for**

### **Combining population genomics and forward simulations to investigate stocking impacts: A case study of Muskellunge (*Esox masquinongy*) from the St. Lawrence River basin**

Quentin Rougemont, Anne Carrier, Jeremy Leluyer, Anne-Laure Ferchaud, John M. Farrell, Daniel Hatin, Philippe Brodeur, Louis Bernatchez, 2019, Evolutionary Applications

**Fig S1: A simplified representation of the stocking activity in the St. Lawrence water from 1950 until the end of stocking in 1997.**

The varying intensity of the arrows depicts the intensity of stocking from the different source in each time periods. The dotted arrow from Pigeon lake reflects an unknown quantity of fishes introduced in the 1950-1965 time period.

The Table below extracted from De Lafontaine (unpublished results) displays the number of fish used for stocking in waters of the St Lawrence. Values in italic present detailed information for each sectors within the St.Lawrence River

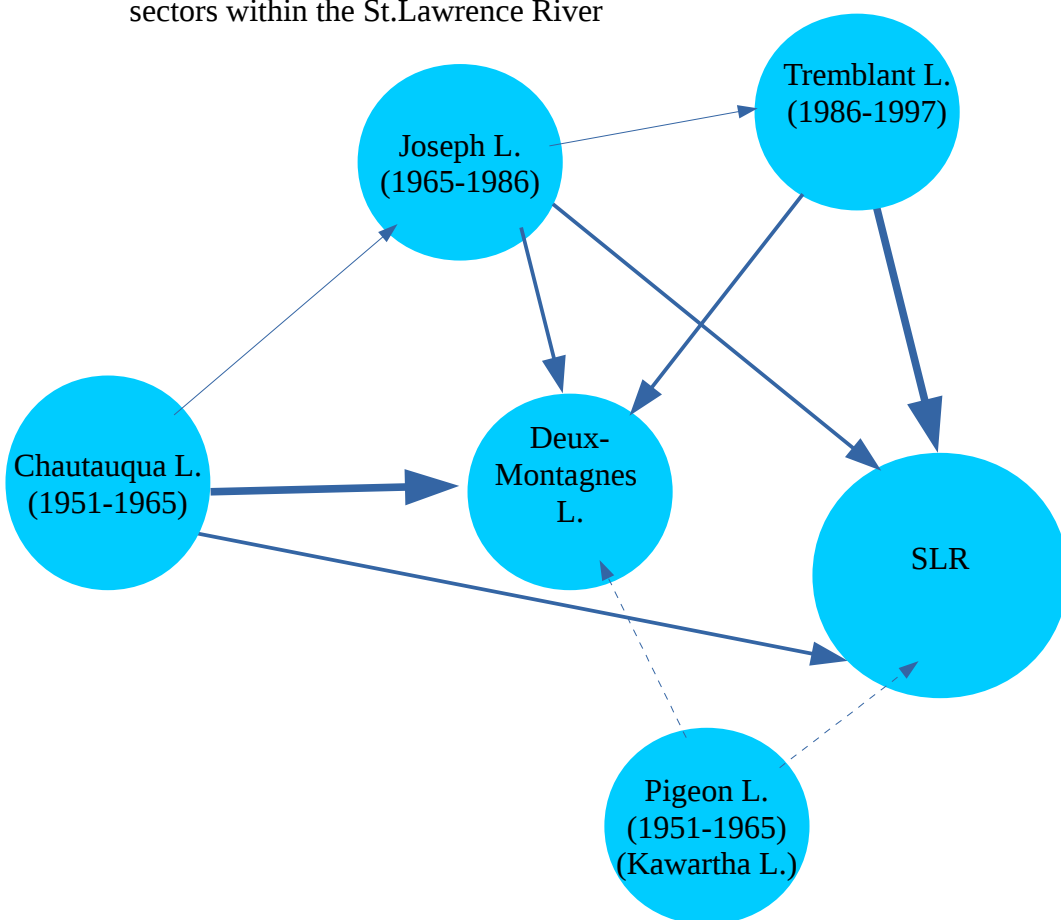

| <b>Location</b>                                | <b>Larvae<br/>(&lt; 5 cm)</b> | <b>Fry<br/>(5-27 cm)</b> | <b>Adults<br/>(&gt; 27 cm)</b> | <b>Total</b>     |
|------------------------------------------------|-------------------------------|--------------------------|--------------------------------|------------------|
| <b>St.Lawrence River (SLR):</b>                | <b>441,800</b>                | <b>593,173</b>           | <b>135</b>                     | <b>1,035,108</b> |
| <i>Lake St.Francois</i>                        |                               | <i>77,494</i>            | <i>2</i>                       | <i>77,49</i>     |
| <i>Beauharnois Canal &amp; Soulanges Canal</i> | <i>30,000</i>                 | <i>11,250</i>            |                                | <i>41,250</i>    |
| <i>Lake St.Louis</i>                           | <i>271,800</i>                | <i>168,980</i>           | <i>133</i>                     | <i>440,913</i>   |
| <i>Lake Deux-Montagnes</i>                     | <i>20,000</i>                 | <i>81,692</i>            |                                | <i>101,692</i>   |
| <i>Des Mille-Isles / Des Prairies Rivers</i>   |                               | <i>38,297</i>            |                                | <i>38,297</i>    |
| <i>River stretch (downstream Montreal)</i>     | <i>120,000</i>                | <i>208,160</i>           |                                | <i>328,160</i>   |
| <i>Lake St.Pierre</i>                          |                               | <i>7,300</i>             |                                | <i>7,300</i>     |
| Inland lakes & rivers – North of SLR           | 300,000                       | 74,880                   |                                | 329,880          |
| Inland lakes & rivers – South of SLR           |                               | 17,825                   | 2                              | 17,827           |
| Tributaries of SLR                             | 112,000                       | 88,908                   | 60                             | 200,968          |
| <b>All</b>                                     | <b>853,800</b>                | <b>729,786</b>           | <b>197</b>                     | <b>1,583,108</b> |

Fig S2: Isolation by Distance within the St. Lawrence

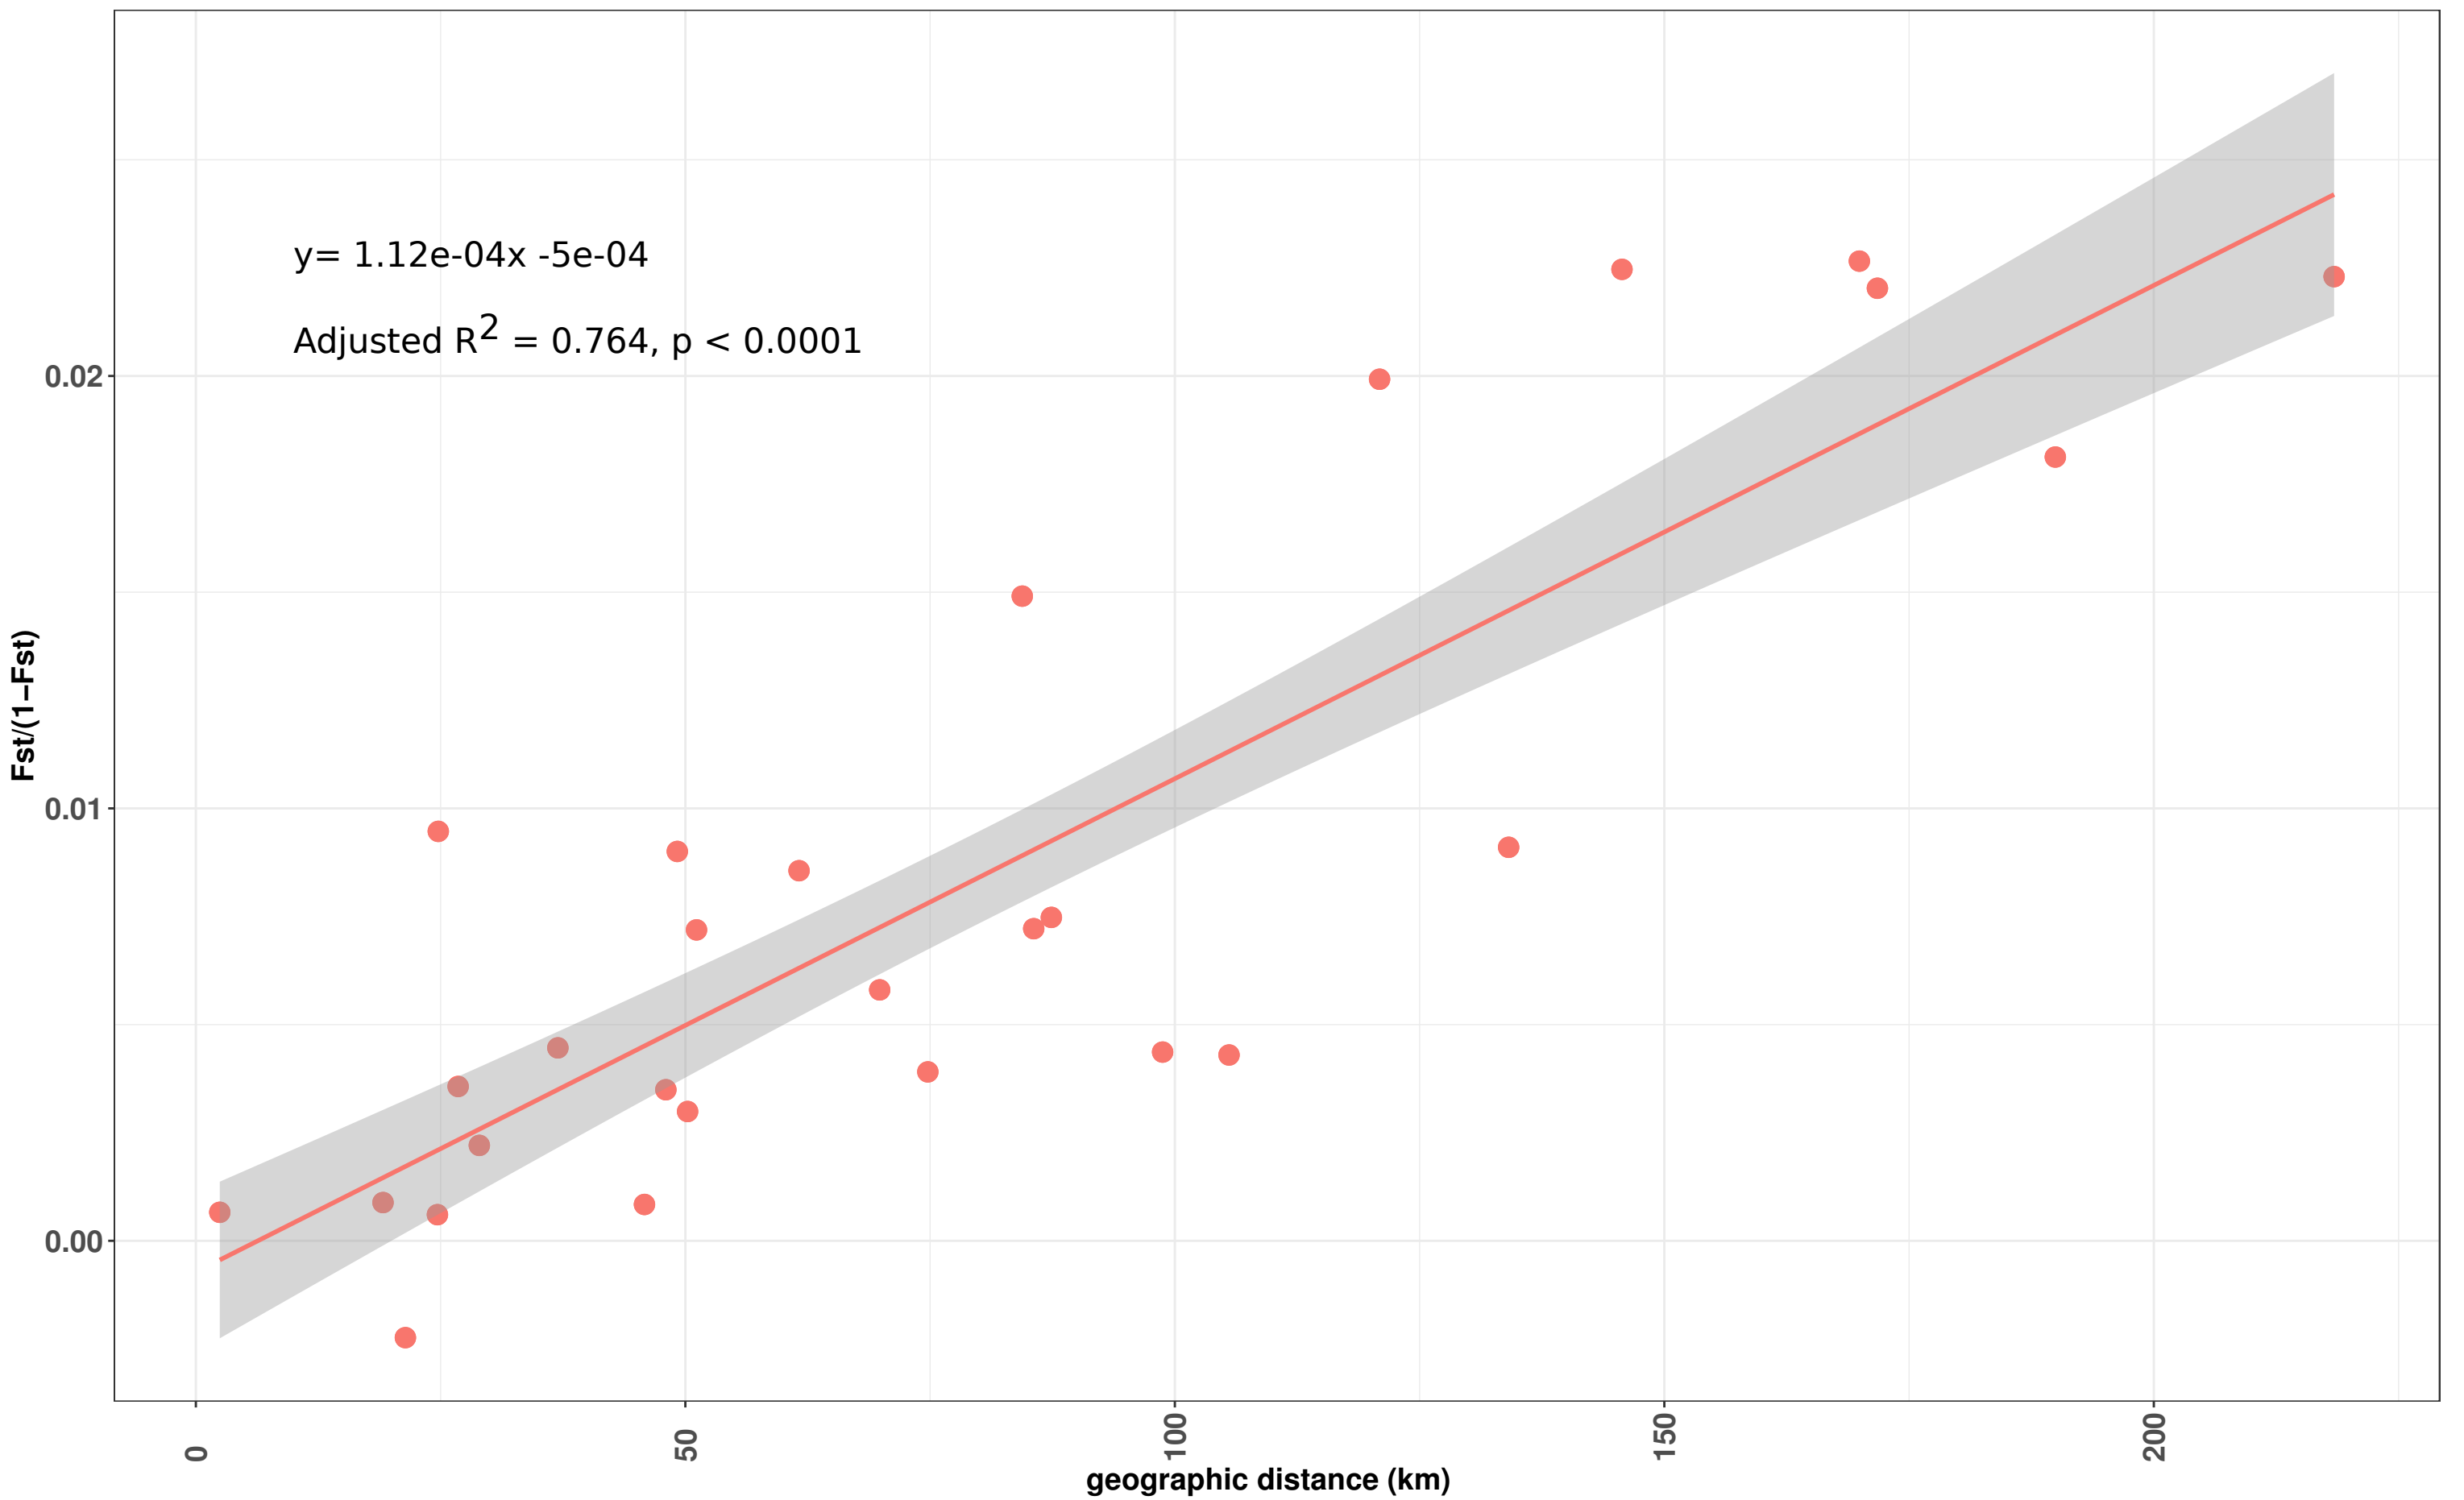

**Figure S3: (a) admixture Cross-validation plot obtained for the 643 individuals and different K values. (b) admixture plots for different K values.**

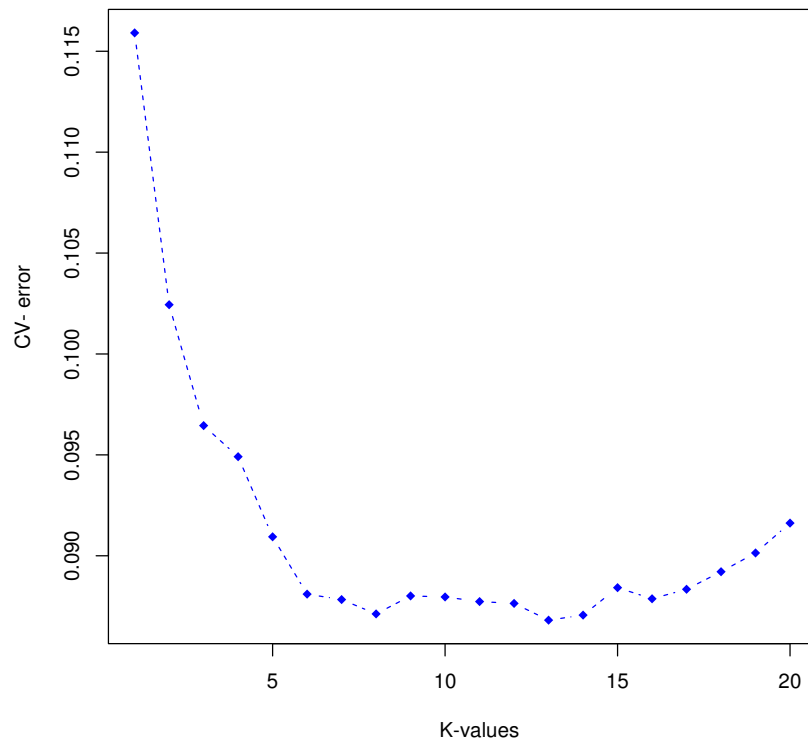

a)

Muskellunge Population Structure

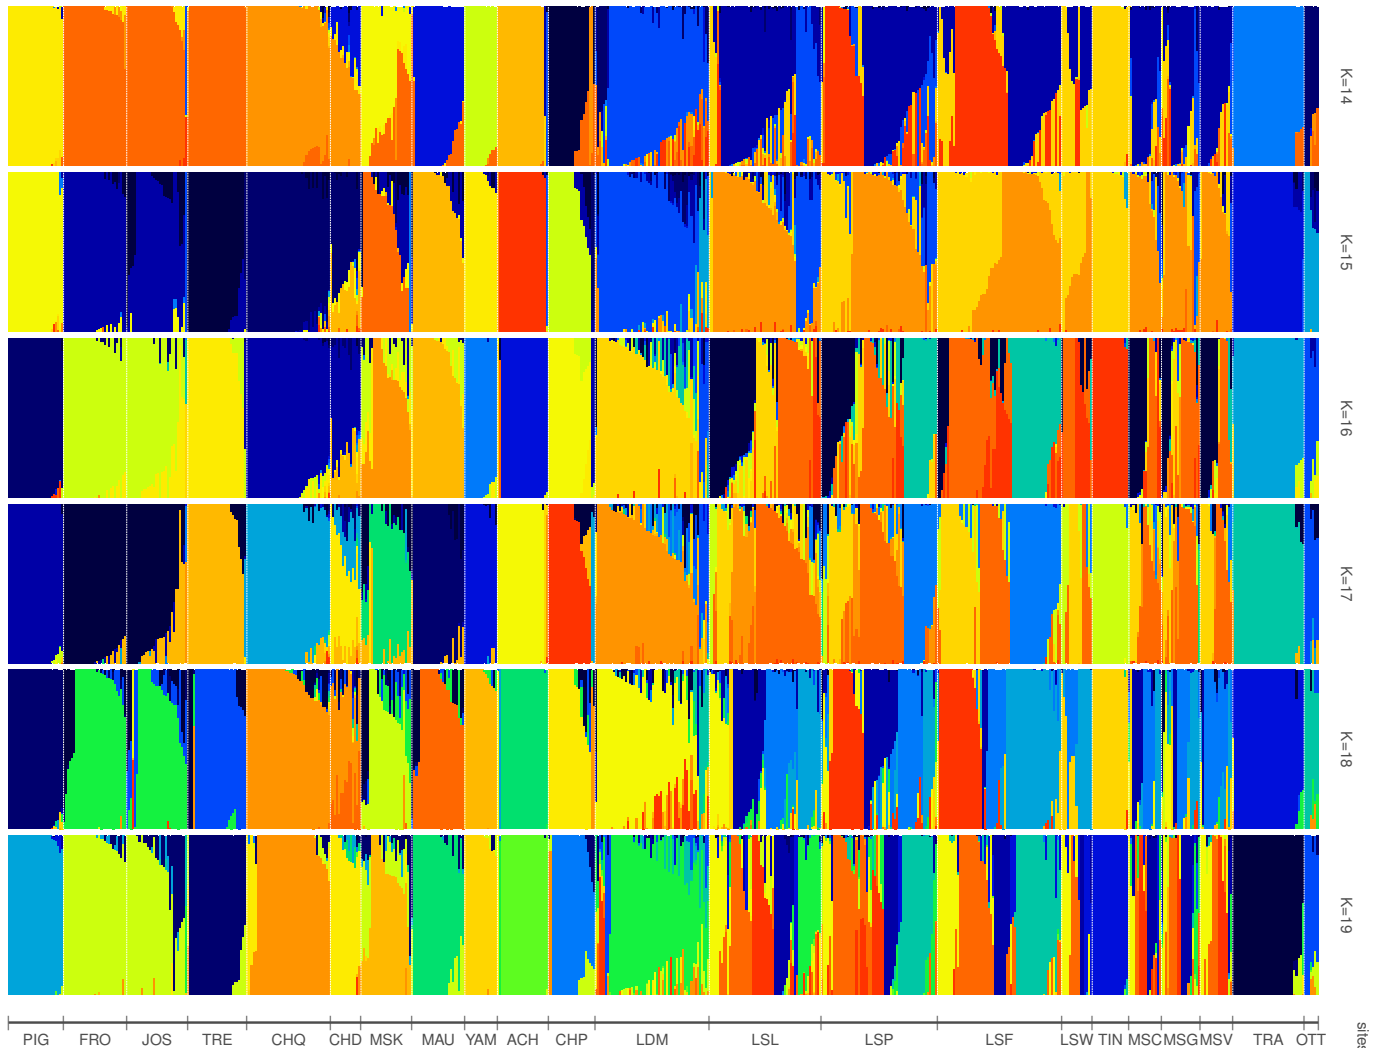

b)

Figure S4: Simulated models of divergence with admixture.

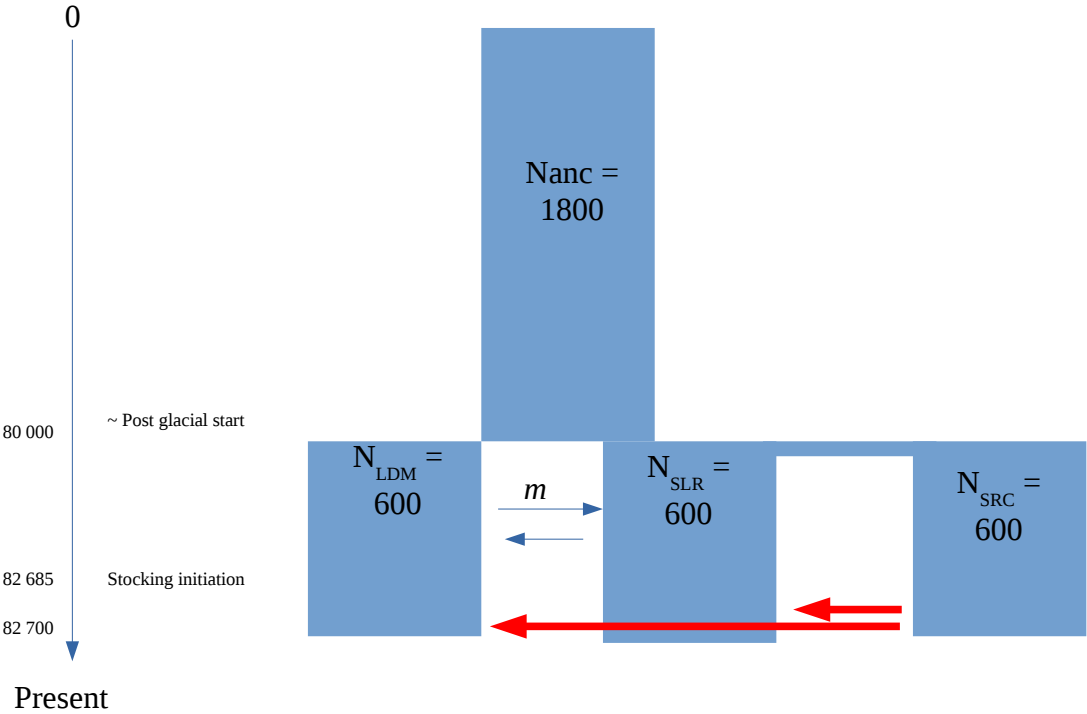

|    | popA | popB | sxA_avg | sxB_avg | ss_avg | piA_avg   | piB_avg   | divAB_avg | netDivAB_avg | FST_avg    |
|----|------|------|---------|---------|--------|-----------|-----------|-----------|--------------|------------|
| 1  | CHD  | ACH  | 0.205   | 0.286   | 0.751  | 0.0032014 | 0.0030203 | 0.0038205 | 0.0007097    | 0.0385870  |
| 2  | CHP  | ACH  | 0.198   | 0.284   | 0.774  | 0.0031345 | 0.0030831 | 0.0037389 | 0.0006301    | 0.0593632  |
| 3  | CHP  | CHD  | 0.215   | 0.216   | 0.814  | 0.0033180 | 0.0034589 | 0.0038798 | 0.0004914    | 0.0144615  |
| 4  | CHQ  | ACH  | 0.283   | 0.242   | 0.747  | 0.0028121 | 0.0028858 | 0.0036830 | 0.0008341    | 0.0563876  |
| 5  | CHQ  | CHD  | 0.278   | 0.152   | 0.838  | 0.0030421 | 0.0033182 | 0.0032695 | 0.0000893    | -0.0733390 |
| 6  | CHQ  | CHP  | 0.289   | 0.168   | 0.828  | 0.0030493 | 0.0031962 | 0.0036785 | 0.0005558    | 0.0507369  |
| 7  | FRO  | ACH  | 0.236   | 0.298   | 0.736  | 0.0028773 | 0.0030074 | 0.0038473 | 0.0009049    | 0.0758679  |
| 8  | FRO  | CHD  | 0.221   | 0.197   | 0.843  | 0.0031494 | 0.0034913 | 0.0034753 | 0.0001550    | -0.0492876 |
| 9  | FRO  | CHP  | 0.229   | 0.201   | 0.853  | 0.0031961 | 0.0033988 | 0.0038944 | 0.0005970    | 0.0557195  |
| 10 | FRO  | CHD  | 0.148   | 0.252   | 0.895  | 0.0030812 | 0.0031284 | 0.0032449 | 0.0001401    | 0.0180456  |
| 11 | JOS  | ACH  | 0.254   | 0.234   | 0.773  | 0.0028505 | 0.0029349 | 0.0037352 | 0.0008425    | 0.0739751  |
| 12 | JOS  | CHD  | 0.263   | 0.163   | 0.828  | 0.0030355 | 0.0033192 | 0.0033171 | 0.0001398    | -0.0256134 |
| 13 | JOS  | CHP  | 0.272   | 0.171   | 0.828  | 0.0030589 | 0.0032047 | 0.0036815 | 0.0005497    | 0.0564989  |
| 14 | JOS  | CHQ  | 0.181   | 0.203   | 0.892  | 0.0029813 | 0.0029800 | 0.0030750 | 0.0000944    | 0.0015817  |
| 15 | JOS  | FRO  | 0.228   | 0.140   | 0.909  | 0.0031623 | 0.0031127 | 0.0031743 | 0.0000368    | 0.0027899  |
| 16 | LDM  | ACH  | 0.377   | 0.082   | 0.820  | 0.0030772 | 0.0026210 | 0.0031683 | 0.0003192    | 0.0715063  |
| 17 | LDM  | CHD  | 0.438   | 0.080   | 0.756  | 0.0030769 | 0.0027878 | 0.0032734 | 0.0003410    | 0.0104840  |
| 18 | LDM  | CHP  | 0.449   | 0.084   | 0.749  | 0.0030705 | 0.0026623 | 0.0032138 | 0.0003474    | 0.0686423  |
| 19 | LDM  | CHQ  | 0.363   | 0.116   | 0.805  | 0.0030115 | 0.0024964 | 0.0031726 | 0.0004187    | 0.0619425  |
| 20 | LDM  | FRO  | 0.449   | 0.111   | 0.729  | 0.0030352 | 0.0024765 | 0.0032421 | 0.0004862    | 0.0780516  |
| 21 | LDM  | JOS  | 0.362   | 0.092   | 0.825  | 0.0030576 | 0.0025319 | 0.0032187 | 0.0004240    | 0.0739248  |
| 22 | LSF  | ACH  | 0.369   | 0.122   | 0.801  | 0.0030488 | 0.0026764 | 0.0032729 | 0.0004103    | 0.0502516  |
| 23 | LSF  | CHD  | 0.453   | 0.144   | 0.683  | 0.0029540 | 0.0027575 | 0.0033641 | 0.0005084    | -0.0337684 |
| 24 | LSF  | CHP  | 0.447   | 0.139   | 0.697  | 0.0029891 | 0.0026809 | 0.0032986 | 0.0004637    | 0.0435096  |
| 25 | LSF  | CHQ  | 0.375   | 0.175   | 0.738  | 0.0028943 | 0.0024718 | 0.0032870 | 0.0006039    | 0.0752434  |
| 26 | LSF  | FRO  | 0.457   | 0.167   | 0.668  | 0.0029293 | 0.0024592 | 0.0033726 | 0.0006784    | 0.0804195  |
| 27 | LSF  | JOS  | 0.385   | 0.164   | 0.737  | 0.0029221 | 0.0029214 | 0.0033140 | 0.0006067    | 0.0716988  |
| 28 | LSF  | LDM  | 0.162   | 0.208   | 0.928  | 0.0028330 | 0.0029244 | 0.0029724 | 0.0009052    | 0.0094015  |
| 29 | LSL  | ACH  | 0.384   | 0.075   | 0.820  | 0.0030694 | 0.0025979 | 0.0031718 | 0.0003381    | 0.0787662  |
| 30 | LSL  | CHD  | 0.447   | 0.078   | 0.744  | 0.0030409 | 0.0027388 | 0.0032828 | 0.0003929    | 0.0235034  |
| 31 | LSL  | CHP  | 0.457   | 0.080   | 0.747  | 0.0030573 | 0.0026379 | 0.0032174 | 0.0003698    | 0.0767192  |
| 32 | LSL  | CHQ  | 0.397   | 0.137   | 0.756  | 0.0029403 | 0.0024210 | 0.0031847 | 0.0005041    | 0.0704910  |
| 33 | LSL  | FRO  | 0.454   | 0.101   | 0.726  | 0.0030126 | 0.0024393 | 0.0032709 | 0.0005450    | 0.0875128  |
| 34 | LSL  | JOS  | 0.397   | 0.114   | 0.777  | 0.0029804 | 0.0024570 | 0.0032254 | 0.0005067    | 0.0792839  |
| 35 | LSL  | LDM  | 0.172   | 0.152   | 0.976  | 0.0029138 | 0.0028941 | 0.0029635 | 0.0000596    | 0.0066376  |
| 36 | LSL  | LSF  | 0.212   | 0.137   | 0.949  | 0.0029542 | 0.0028438 | 0.0029270 | 0.0000280    | -0.0007533 |
| 37 | LSP  | ACH  | 0.387   | 0.092   | 0.807  | 0.0030128 | 0.0026120 | 0.0031770 | 0.0003646    | 0.0686410  |
| 38 | LSP  | CHD  | 0.458   | 0.101   | 0.711  | 0.0029531 | 0.0027183 | 0.0032811 | 0.0004454    | -0.0032525 |
| 39 | LSP  | CHP  | 0.452   | 0.094   | 0.733  | 0.0029961 | 0.0026453 | 0.0032412 | 0.0004206    | 0.0616424  |
| 40 | LSP  | CHQ  | 0.376   | 0.134   | 0.775  | 0.0029041 | 0.0024550 | 0.0032181 | 0.0005386    | 0.0712683  |
| 41 | LSP  | FRO  | 0.467   | 0.126   | 0.700  | 0.0029269 | 0.0024295 | 0.0032812 | 0.0006030    | 0.0831387  |
| 42 | LSP  | JOS  | 0.380   | 0.114   | 0.786  | 0.0029455 | 0.0024838 | 0.0032536 | 0.0005390    | 0.0764743  |
| 43 | LSP  | LDM  | 0.160   | 0.155   | 0.979  | 0.0028656 | 0.0029154 | 0.0029548 | 0.0000644    | 0.0076327  |
| 44 | LSP  | LSF  | 0.178   | 0.122   | 0.994  | 0.0029538 | 0.0029146 | 0.0029424 | 0.0000082    | -0.0005377 |
| 45 | LSP  | LSL  | 0.147   | 0.160   | 0.997  | 0.0028731 | 0.0029423 | 0.0029257 | 0.0000180    | 0.0015614  |
| 46 | MAS  | ACH  | 0.232   | 0.227   | 0.794  | 0.0035021 | 0.0029801 | 0.0036938 | 0.0004527    | -0.0037864 |
| 47 | MAS  | CHD  | 0.311   | 0.235   | 0.686  | 0.0034193 | 0.0030953 | 0.0038195 | 0.0005622    | 0.0540048  |
| 48 | MAS  | CHP  | 0.316   | 0.237   | 0.694  | 0.0034543 | 0.0029962 | 0.0037492 | 0.0005240    | -0.0105888 |
| 49 | MAS  | CHQ  | 0.278   | 0.308   | 0.677  | 0.0032554 | 0.0026907 | 0.0036574 | 0.0006843    | -0.0910666 |
| 50 | MAS  | FRO  | 0.334   | 0.274   | 0.651  | 0.0033667 | 0.0027397 | 0.0037931 | 0.0007399    | -0.0279082 |
| 51 | MAS  | JOS  | 0.274   | 0.284   | 0.697  | 0.0033083 | 0.0027291 | 0.0037068 | 0.0006881    | -0.0188995 |
| 52 | MAS  | LDM  | 0.085   | 0.372   | 0.818  | 0.0030758 | 0.0030679 | 0.0031963 | 0.0001245    | -0.0304527 |
| 53 | MAS  | LSF  | 0.056   | 0.308   | 0.913  | 0.0032992 | 0.0031972 | 0.0032664 | 0.0000182    | -0.0275856 |
| 54 | MAS  | LSL  | 0.048   | 0.362   | 0.855  | 0.0030840 | 0.0030989 | 0.0031077 | 0.0000163    | 0.0165756  |
| 55 | MAS  | LSP  | 0.060   | 0.355   | 0.861  | 0.0031338 | 0.0030722 | 0.0031346 | 0.0000316    | -0.0050888 |
| 56 | MAU  | ACH  | 0.228   | 0.292   | 0.746  | 0.0030601 | 0.0030268 | 0.0038421 | 0.0007986    | 0.0733964  |
| 57 | MAU  | CHD  | 0.194   | 0.183   | 0.875  | 0.0033795 | 0.0035532 | 0.0036554 | 0.0001890    | -0.0153591 |
| 58 | MAU  | CHP  | 0.236   | 0.220   | 0.816  | 0.0033105 | 0.0033370 | 0.0039019 | 0.0005782    | 0.0555716  |
| 59 | MAU  | CHQ  | 0.174   | 0.285   | 0.827  | 0.0031487 | 0.0030270 | 0.0033542 | 0.0002663    | 0.0229764  |
| 60 | MAU  | FRO  | 0.185   | 0.201   | 0.895  | 0.0034114 | 0.0032352 | 0.0035591 | 0.0002358    | 0.0239821  |
| 61 | MAU  | JOS  | 0.160   | 0.263   | 0.853  | 0.0031995 | 0.0030814 | 0.0033488 | 0.0002084    | 0.0257194  |
| 62 | MAU  | LDM  | 0.104   | 0.443   | 0.724  | 0.0026143 | 0.0030370 | 0.0032493 | 0.0004237    | 0.0693781  |
| 63 | MAU  | LSF  | 0.157   | 0.457   | 0.680  | 0.0026261 | 0.0029601 | 0.0033957 | 0.0006027    | 0.0637479  |
| 64 | MAU  | LSL  | 0.094   | 0.452   | 0.734  | 0.0025900 | 0.0030238 | 0.0032872 | 0.0004803    | 0.0797389  |
| 65 | MAU  | LSP  | 0.118   | 0.460   | 0.707  | 0.0025843 | 0.0029466 | 0.0032982 | 0.0005327    | 0.0708431  |
| 66 | MAU  | MAS  | 0.262   | 0.327   | 0.666  | 0.0029212 | 0.0033983 | 0.0038307 | 0.0006704    | 0.0038742  |
| 67 | MIL  | ACH  | 0.235   | 0.226   | 0.798  | 0.0033860 | 0.0029771 | 0.0036553 | 0.0004738    | 0.0223787  |
| 68 | MIL  | CHD  | 0.308   | 0.224   | 0.711  | 0.0033429 | 0.0031212 | 0.0037963 | 0.0005642    | 0.0573003  |
| 69 | MIL  | CHP  | 0.311   | 0.227   | 0.714  | 0.0033671 | 0.0030151 | 0.0037214 | 0.0005303    | 0.0343833  |
| 70 | MIL  | CHQ  | 0.271   | 0.299   | 0.696  | 0.0031699 | 0.0027080 | 0.0036310 | 0.0006920    | -0.0353158 |
| 71 | MIL  | FRO  | 0.324   | 0.255   | 0.682  | 0.0032975 | 0.0027758 | 0.0037942 | 0.0007576    | 0.0133461  |
| 72 | MIL  | JOS  | 0.264   | 0.274   | 0.717  | 0.0032242 | 0.0027580 | 0.0036952 | 0.0007041    | 0.0197237  |
| 73 | MIL  | LDM  | 0.089   | 0.376   | 0.820  | 0.0029753 | 0.0030681 | 0.0031701 | 0.0001484    | -0.0013795 |
| 74 | MIL  | LSF  | 0.077   | 0.319   | 0.884  | 0.0031487 | 0.0031483 | 0.0032093 | 0.0006080    | -0.0144435 |
| 75 | MIL  | LSL  | 0.056   | 0.364   | 0.855  | 0.0029799 | 0.0030954 | 0.0030894 | 0.0000518    | 0.0293529  |
| 76 | MIL  | LSP  | 0.071   | 0.363   | 0.847  | 0.0030091 | 0.0030502 | 0.0030962 | 0.0000665    | 0.0116722  |
| 77 | MIL  | MAS  | 0.180   | 0.173   | 0.895  | 0.0035302 | 0.0036474 | 0.0036231 | 0.0000343    | 0.0013384  |
| 78 | MIL  | MAU  | 0.318   | 0.248   | 0.693  | 0.0033213 | 0.0029566 | 0.0038145 | 0.0006760    | 0.0393241  |
| 79 | MSC  | ACH  | 0.246   | 0.201   | 0.796  | 0.0034033 | 0.0029079 | 0.0035435 | 0.0003879    | -0.0035523 |
| 80 | MSC  | CHD  | 0.314   | 0.201   | 0.716  | 0.0033676 | 0.0030650 | 0.0037014 | 0.0004851    | 0.0497782  |
| 81 | MSC  | CHP  | 0.327   | 0.203   | 0.716  | 0.0034022 | 0.0029579 | 0.0036239 | 0.0004439    | 0.0068896  |
| 82 | MSC  | CHQ  | 0.281   | 0.267   | 0.716  | 0.0032300 | 0.0026753 | 0.0035577 | 0.0006050    | -0.0869112 |
| 83 | MSC  | FRO  | 0.339   | 0.236   | 0.682  | 0.0033245 | 0.0027180 | 0.0036754 | 0.0006542    | -0.0271725 |
| 84 | MSC  | JOS  | 0.267   | 0.244   | 0.739  | 0.0032845 | 0.0027287 | 0.0036172 | 0.0006106    | -0.0174102 |
| 85 | MSC  | LDM  | 0.083   | 0.330   | 0.862  | 0.0030710 | 0.0030775 | 0.0031555 | 0.0000812    | -0.0309826 |
| 86 | MSC  | LSF  | 0.093   | 0.293   | 0.888  | 0.0031856 | 0.0030955 | 0.0031639 | 0.0000233    | -0.0677176 |
| 87 | MSC  | LSL  | 0.053   | 0.323   | 0.896  | 0.0030788 | 0.0031073 | 0.0030926 | -0.0000204   | 0.0054298  |
| 88 | MSC  | LSP  | 0.065   | 0.319   | 0.892  | 0.0031087 | 0.0030626 | 0.0031013 | 0.0000157    | -0.0174391 |
| 89 | MSC  | MAS  | 0.200   | 0.157   | 0.882  | 0.0035345 | 0.0035514 | 0.0035510 | 0.0000080    | 0.0026766  |
| 90 | MSC  | MAU  | 0.327   | 0.223   | 0.703  | 0.0033619 | 0.0029054 | 0.0037190 | 0.0000583    | 0.0019818  |
| 91 | MSC  | MIL  | 0.198   | 0.163   | 0.882  | 0.0035193 | 0.0034199 | 0.0035095 | 0.0000399    | 0.0013146  |
| 92 | MSG  | ACH  | 0.267   | 0.163   | 0.822  | 0.0033884 | 0.0028737 | 0.0034985 | 0.0003674    | 0.0086798  |
| 93 | MSG  | CHD  | 0.338   | 0.160   | 0.741  | 0.0033551 | 0.0030209 | 0.0036101 | 0.0004221    | 0.0507400  |
| 94 | MSG  | CHP  | 0.343   | 0.169   | 0.744  | 0.0033843 | 0.0029252 | 0.0035695 | 0.0004148    | 0.0232618  |
| 95 | MSG  | CHQ  | 0.295   | 0.229   | 0.741  | 0.0032092 | 0.0026436 | 0.0034625 | 0.0005361    | -0.0548301 |
| 96 | MSG  | FRO  | 0.360   | 0.204   | 0.703  | 0.0032986 | 0.0026767 | 0.0035659 | 0.0005782    | -0.0032537 |
| 97 | MSG  | JOS  | 0.289   | 0.202   | 0.768  | 0.0032791 | 0.0027010 | 0.0035308 | 0.0005407    | 0.0022561  |
| 98 | MSG  | LDM  | 0.094   | 0.293   | 0.895  | 0.0030696 | 0.0030566 | 0.0031312 | 0.0000682    | -0.0232905 |
| 99 | MSG  | LS   |         |         |        |           |           |           |              |            |

**Table S1: pairwise Weir & CockerhamFst values.**

Non significant Fst values are in bold

|            | ACH   | CHD   | CHP   | CHQ   | FRO   | JOS   | LDM   | LSF   | LSL          | LSP   | LSW   | MAU   | TIN   | MSC           | MSG          | MSK   | MSV   | PIG   | OTT   | TRA   | TRE   |  |
|------------|-------|-------|-------|-------|-------|-------|-------|-------|--------------|-------|-------|-------|-------|---------------|--------------|-------|-------|-------|-------|-------|-------|--|
| <b>CHD</b> | 0.250 |       |       |       |       |       |       |       |              |       |       |       |       |               |              |       |       |       |       |       |       |  |
| <b>CHP</b> | 0.222 | 0.172 |       |       |       |       |       |       |              |       |       |       |       |               |              |       |       |       |       |       |       |  |
| <b>CHQ</b> | 0.290 | 0.039 | 0.198 |       |       |       |       |       |              |       |       |       |       |               |              |       |       |       |       |       |       |  |
| <b>FRO</b> | 0.309 | 0.073 | 0.207 | 0.056 |       |       |       |       |              |       |       |       |       |               |              |       |       |       |       |       |       |  |
| <b>JOS</b> | 0.291 | 0.063 | 0.195 | 0.047 | 0.013 |       |       |       |              |       |       |       |       |               |              |       |       |       |       |       |       |  |
| <b>LDM</b> | 0.124 | 0.129 | 0.135 | 0.168 | 0.185 | 0.166 |       |       |              |       |       |       |       |               |              |       |       |       |       |       |       |  |
| <b>LSF</b> | 0.156 | 0.193 | 0.178 | 0.235 | 0.252 | 0.233 | 0.044 |       |              |       |       |       |       |               |              |       |       |       |       |       |       |  |
| <b>LSL</b> | 0.136 | 0.158 | 0.149 | 0.204 | 0.216 | 0.200 | 0.023 | 0.009 |              |       |       |       |       |               |              |       |       |       |       |       |       |  |
| <b>LSP</b> | 0.144 | 0.172 | 0.162 | 0.216 | 0.231 | 0.212 | 0.030 | 0.004 | 0.004        |       |       |       |       |               |              |       |       |       |       |       |       |  |
| <b>LSW</b> | 0.161 | 0.192 | 0.186 | 0.246 | 0.264 | 0.241 | 0.046 | 0.004 | 0.008        | 0.009 |       |       |       |               |              |       |       |       |       |       |       |  |
| <b>MAU</b> | 0.272 | 0.082 | 0.198 | 0.112 | 0.100 | 0.089 | 0.162 | 0.225 | 0.190        | 0.204 | 0.229 |       |       |               |              |       |       |       |       |       |       |  |
| <b>TIN</b> | 0.174 | 0.202 | 0.187 | 0.252 | 0.271 | 0.249 | 0.055 | 0.020 | 0.022        | 0.022 | 0.015 | 0.236 |       |               |              |       |       |       |       |       |       |  |
| <b>MSC</b> | 0.152 | 0.175 | 0.167 | 0.226 | 0.243 | 0.222 | 0.030 | 0.006 | <b>0.001</b> | 0.002 | 0.004 | 0.211 | 0.018 |               |              |       |       |       |       |       |       |  |
| <b>MSG</b> | 0.137 | 0.153 | 0.153 | 0.203 | 0.218 | 0.198 | 0.024 | 0.009 | <b>0.001</b> | 0.003 | 0.007 | 0.190 | 0.022 | <b>-0.002</b> |              |       |       |       |       |       |       |  |
| <b>MSK</b> | 0.189 | 0.094 | 0.153 | 0.127 | 0.123 | 0.112 | 0.096 | 0.143 | 0.113        | 0.125 | 0.137 | 0.128 | 0.147 | 0.122         | 0.103        |       |       |       |       |       |       |  |
| <b>MSV</b> | 0.152 | 0.167 | 0.163 | 0.219 | 0.235 | 0.215 | 0.034 | 0.007 | 0.004        | 0.003 | 0.007 | 0.205 | 0.022 | <b>0.001</b>  | <b>0.001</b> | 0.121 |       |       |       |       |       |  |
| <b>PIG</b> | 0.482 | 0.461 | 0.486 | 0.473 | 0.506 | 0.484 | 0.354 | 0.382 | 0.365        | 0.371 | 0.444 | 0.468 | 0.443 | 0.441         | 0.417        | 0.410 | 0.435 |       |       |       |       |  |
| <b>OTT</b> | 0.194 | 0.128 | 0.175 | 0.181 | 0.200 | 0.179 | 0.083 | 0.138 | 0.109        | 0.122 | 0.135 | 0.166 | 0.140 | 0.122         | 0.103        | 0.111 | 0.117 | 0.469 |       |       |       |  |
| <b>TRA</b> | 0.499 | 0.551 | 0.518 | 0.521 | 0.555 | 0.538 | 0.377 | 0.397 | 0.388        | 0.389 | 0.487 | 0.534 | 0.492 | 0.479         | 0.453        | 0.435 | 0.477 | 0.709 | 0.571 |       |       |  |
| <b>TRE</b> | 0.320 | 0.079 | 0.222 | 0.064 | 0.048 | 0.035 | 0.199 | 0.265 | 0.230        | 0.245 | 0.276 | 0.111 | 0.285 | 0.257         | 0.233        | 0.143 | 0.250 | 0.521 | 0.215 | 0.567 |       |  |
| <b>YAM</b> | 0.232 | 0.260 | 0.246 | 0.295 | 0.312 | 0.295 | 0.164 | 0.203 | 0.179        | 0.191 | 0.210 | 0.288 | 0.222 | 0.205         | 0.187        | 0.216 | 0.200 | 0.520 | 0.240 | 0.574 | 0.330 |  |

**Table S3 Description of the major models tested in this study.**

Model 1 to 17 described the major model tested without mortality rate. These models were tested with varying population size of the 3 descendent population (N= 400/600/800/1600).

Model 18 to 23 are the equivalent of model 9 to 11 with varying mortality rate (column Death rate) and with varying migration rate from LDM to SLR. SRC = Source population used for stocking. Given the shared patterns of ancestry between the population used for stocking (i.e. Chautauqua, Joseph and Tremblant lake) individuals were merged together and modelled as a single unit. Given that no sign of ancestry from Pigeon lake was find in the Saint Lawrence (SLR) or the Lac des Deux-Montagnes (LDM) it was not modelled here.

Based on our observation of higher admixture in LDM than in SLR, the migration rate (m) was twice higher in LDM than in SLR.

| name           | N (Size)                | Death rate            | m SRC →<br>SLR  | m SRC →<br>LDM  | m SLR →<br>LDM | m LDM →<br>SLR |
|----------------|-------------------------|-----------------------|-----------------|-----------------|----------------|----------------|
| <b>model01</b> | <b>400/600/800/1600</b> | <b>0</b>              | <b>0.000001</b> | <b>0.000002</b> | <b>0.0005</b>  | <b>0.001</b>   |
| <b>model02</b> | <b>400/600/800/1600</b> | <b>0</b>              | <b>0.00001</b>  | <b>0.00002</b>  | <b>0.0005</b>  | <b>0.001</b>   |
| <b>model03</b> | <b>400/600/800/1600</b> | <b>0</b>              | <b>0.0001</b>   | <b>0.000015</b> | <b>0.0005</b>  | <b>0.001</b>   |
| <b>model04</b> | <b>400/600/800/1600</b> | <b>0</b>              | <b>0.001</b>    | <b>0.00015</b>  | <b>0.0005</b>  | <b>0.001</b>   |
| <b>model05</b> | <b>400/600/800/1600</b> | <b>0</b>              | <b>0.01</b>     | <b>0.0015</b>   | <b>0.0005</b>  | <b>0.001</b>   |
| <b>model06</b> | <b>400/600/800/1600</b> | <b>0</b>              | <b>0.005</b>    | <b>0.0075</b>   | <b>0.0005</b>  | <b>0.001</b>   |
| <b>model07</b> | <b>400/600/800/1600</b> | <b>0</b>              | <b>0.0033</b>   | <b>0.005</b>    | <b>0.0005</b>  | <b>0.001</b>   |
| <b>model08</b> | <b>400/600/800/1600</b> | <b>0</b>              | <b>0.0025</b>   | <b>0.00375</b>  | <b>0.0005</b>  | <b>0.001</b>   |
| <b>model09</b> | <b>400/600/800/1600</b> | <b>0</b>              | <b>0.005</b>    | <b>0.0075</b>   | <b>0.0003</b>  | <b>0.00015</b> |
| <b>model10</b> | <b>400/600/800/1600</b> | <b>0</b>              | <b>0.0033</b>   | <b>0.005</b>    | <b>0.0003</b>  | <b>0.00015</b> |
| <b>model11</b> | <b>400/600/800/1600</b> | <b>0</b>              | <b>0.0025</b>   | <b>0.00375</b>  | <b>0.0003</b>  | <b>0.00015</b> |
| <b>model12</b> | <b>400/600/800/1600</b> | <b>0</b>              | <b>0.1</b>      | <b>0.15</b>     | <b>0.0005</b>  | <b>0.001</b>   |
| <b>model13</b> | <b>400/600/800/1600</b> | <b>0</b>              | <b>0.05</b>     | <b>0.075</b>    | <b>0.0005</b>  | <b>0.001</b>   |
| <b>model14</b> | <b>400/600/800/1600</b> | <b>0</b>              | <b>0.025</b>    | <b>0.0375</b>   | <b>0.0005</b>  | <b>0.001</b>   |
| <b>model15</b> | <b>400/600/800/1600</b> | <b>0</b>              | <b>0.15</b>     | <b>0.225</b>    | <b>0.0005</b>  | <b>0.001</b>   |
| <b>model16</b> | <b>400/600/800/1600</b> | <b>0</b>              | <b>0.2</b>      | <b>0.3</b>      | <b>0.0005</b>  | <b>0.001</b>   |
| <b>model17</b> | <b>400/600/800/1600</b> | <b>0</b>              | <b>0.015</b>    | <b>0.0025</b>   | <b>0.0005</b>  | <b>0.001</b>   |
| <b>model18</b> | <b>400/600/800/1600</b> | <b>50/100/200/400</b> | <b>0.005</b>    | <b>0.0075</b>   | <b>0.0005</b>  | <b>0.001</b>   |
| <b>model19</b> | <b>400/600/800/1600</b> | <b>50/100/200/400</b> | <b>0.0033</b>   | <b>0.005</b>    | <b>0.0005</b>  | <b>0.001</b>   |
| <b>model20</b> | <b>400/600/800/1600</b> | <b>50/100/200/400</b> | <b>0.0025</b>   | <b>0.00375</b>  | <b>0.0005</b>  | <b>0.001</b>   |
| <b>model21</b> | <b>400/600/800/1600</b> | <b>50/100/200/400</b> | <b>0.005</b>    | <b>0.0075</b>   | <b>0.0003</b>  | <b>0.00015</b> |
| <b>model22</b> | <b>400/600/800/1600</b> | <b>50/100/200/400</b> | <b>0.0033</b>   | <b>0.005</b>    | <b>0.0003</b>  | <b>0.00015</b> |
| <b>model23</b> | <b>400/600/800/1600</b> | <b>50/100/200/400</b> | <b>0.0025</b>   | <b>0.00375</b>  | <b>0.0003</b>  | <b>0.00015</b> |



## Supplementary Methods and Results

### 1. Measurement of the symmetry of migration using coalescent simulations and ABC

#### Methods

Migration rate ( $m$ ) was measured using coalescent simulations combined with an ABC procedure for parameter estimation. The objective was to determine if sample sites from the St. Lawrence that displayed weak level of genetic differentiation (e.g.  $F_{st} < 0.01$ ) were connected by gene flow or if this was due to populations with large  $N_e$  evolving independently (i.e. with very low gene flow).

#### a) model and coalescent simulations

The demographic history consists in a set of two subpopulations exchanging migrants in a stepping stone model. Each subpopulation is of size  $N_{upstream}$  and  $N_{downstream}$  and migrants are exchanged at a rate  $M_{ij} = 4N_{ij}m_{ij}$  at each generation. Here  $m_{ij}$  is the fraction of the subpopulation  $i$  made of migrants of each generation from sub-population  $j$ . Migration is modelled randomly and uniformly for each of the upstream and downstream sub-population respectively. Prior for effective population size were uniformly distributed on the interval  $[0 - 500,000]$  and sampled independently for each sub-population. Prior for  $M$  were sampled initially, randomly on the interval  $[0-40]$ . Priors were generated with a modified version of priorgen (Ross-Ibarra et al., 2008), recoded in Python and modified to implement this new model.

Coalescent simulations were performed in *msnSAM*, a modified version of *ms* allowing for variable sample size among loci (Hudson, 2002; Ross-Ibarra et al., 2008). Here, we set the size of the reference population  $N_{ref}$  to 50,000 (the choice of  $N_{ref}$  is arbitrary and used as a scaling factor, without impact on the estimated parameter).

We set the mutation rate  $\mu$  to  $1 \times 10^{-8}$  bp/generation, following many others (e.g. (Barrio et al., 2016; Rougeux, Bernatchez, & Gagnaire, 2017; Tine et al., 2014). While this choice may seem arbitrary, it cancels out when ratio of demographic parameters ( $M$  and  $N$ ) are used and is of minimal concern here. Therefore, we set  $\theta = 4N_{ref} \mu L$  to 0.16. Here  $L$  is the length of the RAD loci (80 pb).

A first round of ABC parameters estimation indicated that the upper bound of the prior distribution was attained at a value of 40 (see results below) while all other parameters were very well estimated. We run another round using a prior ranging between  $[0-80]$ . Since all other parameters were very well estimated, we fixed a narrow prior based on the minimum and maximum value of the posterior distribution from the previous estimation.

#### b) ABC parameters estimation

One million coalescent simulations were generated and associated summary statistics were computed using *mscalc* (Camille Roux et al., 2011)R for each small sequence. The summary statistics are the same as in (Rougemont & Bernatchez, 2018). These include the mean and standard variations of : the nucleotide diversity  $\pi$  (Tajima, 1989), the net divergence between the two populations ( $D_A$ ), the total divergence between populations ( $D_{XY}$ ) (Nei & Kumar, 2000), the between population differentiation ( $F_{st}$ ) value, the number of fixed differences between populations ( $S_f$ ); the number of polymorphic sites private to each population ( $S_{xpop1}$  and  $S_{xpop2}$ ) and the number of shared polymorphic sites ( $S_s$ ); and last the Pearson's  $R^2$  coefficient of correlation in  $\pi$  between the two populations. These statistics represent a panel of commonly used summary indexes in ABC (Fagundes et al., 2007; Ross-Ibarra et al., 2008; C. Roux, Tsagkogeorga, Bierne, & Galtier, 2013; Camille Roux et al., 2016).

Parameters estimation was performed using the "abc" package (Csilléry, François, & Blum, 2012). We used a logit transformation of the parameters and a tolerance of 0.001. The posterior probabilities of parameter values were then estimated using the neural network procedure with nonlinear regressions of the parameters on the summary statistics using 50 feed-forwards neural networks and 15 hidden layers. All scripts to reproduce the results are available on github.

#### c) Choice of populations

The demographic model was tested on two samples located on the St. Lawrence at two extremities of our sampling range. Namely we chose the Lake St. Pierre as the downstream site and lake St. François as our upstream site. Although more upstream populations were available (TIN, Thousand Islands or LSW, St. Lawrence Lake) these sites were also separated by impassable barriers to gene flow (dams) in the upstream direction at least. Such dams would have certainly obscured our inference.

## d) Results

### First round of Parameter estimates:

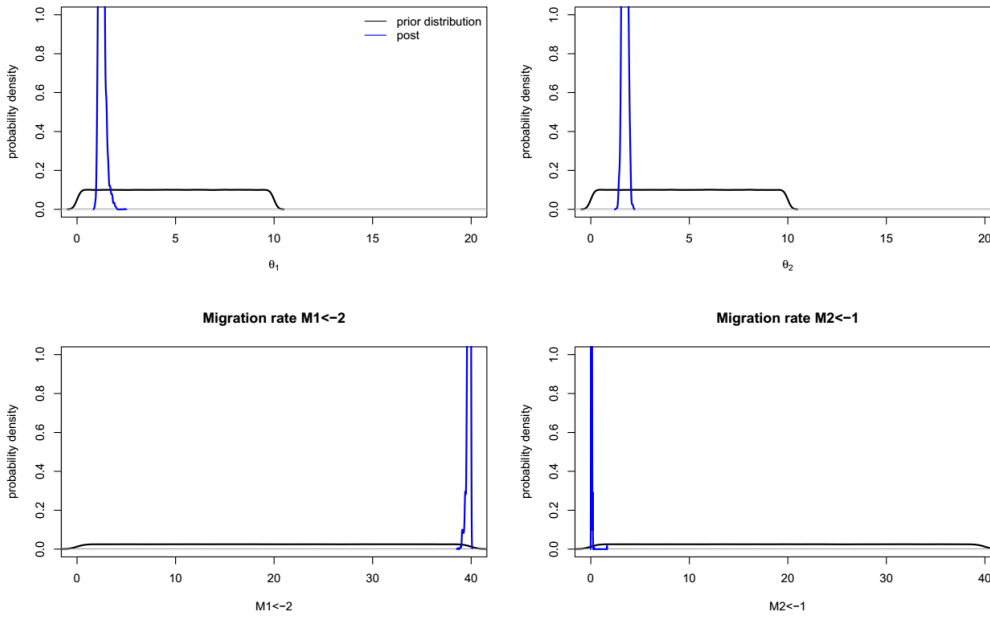

**Figure S5: Posterior distribution of parameter estimates under the demographic model.**

Theta 1 = scaled effective population size of the downstream population (Lake St. Pierre)

Theta 2 = scaled effective population size of the upstream population (Lake St. François)

Migration rate  $M_{1 \leftarrow 2}$  migration from upstream to downstream ( $M_{ij} = 4N_0m_{ij}$ )

Migration rate  $M_{2 \leftarrow 1}$  migration from downstream to upstream.

All values are scaled (in coalescent units).

The black line represents the prior distribution and the blue line represents the posterior distribution obtained after neural-network regression of the 1,000 retained simulations closest to the observed data.

Given that the maximum value of the prior on  $M_{1 \leftarrow 2}$  is reached in this model we performed a new set of 1 million coalescent simulations but using a larger bound on the uniform prior. We used  $M = [0 - 80]$ . Since the remaining parameters were very well estimated, we use the [min-max] value of the posterior of  $N_1$ ,  $N_2$ ,  $M_2$  in these simulations. This was done in order to reduce the number of “uninformative” simulations generated by too large prior as this first round indicated which of the simulation were informative.

### Second round of Parameter estimates:

The results for the second round indicated similar estimates for  $N_1$  and  $N_2$  as in the first round, as expected from their very narrow minimal and maximal posterior distributions. Values for  $M_{2 \leftarrow 1}$  was closer to its previously inferred maximal distribution (median = 1.99 [95%CI = 1.88 – 2.00], Figure S6 below).

The value for  $M_{1 \leftarrow 2}$  again reached the upper bound of  $M = 80$  [95CI = 76.80 – 80]. This would translate into a high number of migrants (i.e. > 22).

## e) Discussion

On the first round of parameters estimation, we note that the upper bound of the prior for  $M_{1 \leftarrow 2}$  is reached. Given the hypothesized performed above ( $N_{ref} = 5e4$ ) we obtained  $m = 0.002$  [95%CI = 39.9-40]. A biologically meaningful number is the total number of migrant each generation. The median value of  $N_1$  given the posterior distribution is  $1.2284 * 5e4 = 61,420$  [95%CI = 1.0391 – 1.5922]\* $5e4$ .

This give 12.284 migrants each generation in the downstream populations. [95%CI = 10.4 – 16] migrants.

Conversely, in the upstream population we have a median value of  $M_{2 \leftarrow 1} = 6.671e-02$  [95%CI = 1.824e-02 – 1.398e-01] and a median of  $N_2 = 1.72 * 5e4$  [95%CI = 1.5127 – 1.9697]\* $5e4$ .

This translate into 0.028 [95%CI = 0.007 – 0.068] migrants.

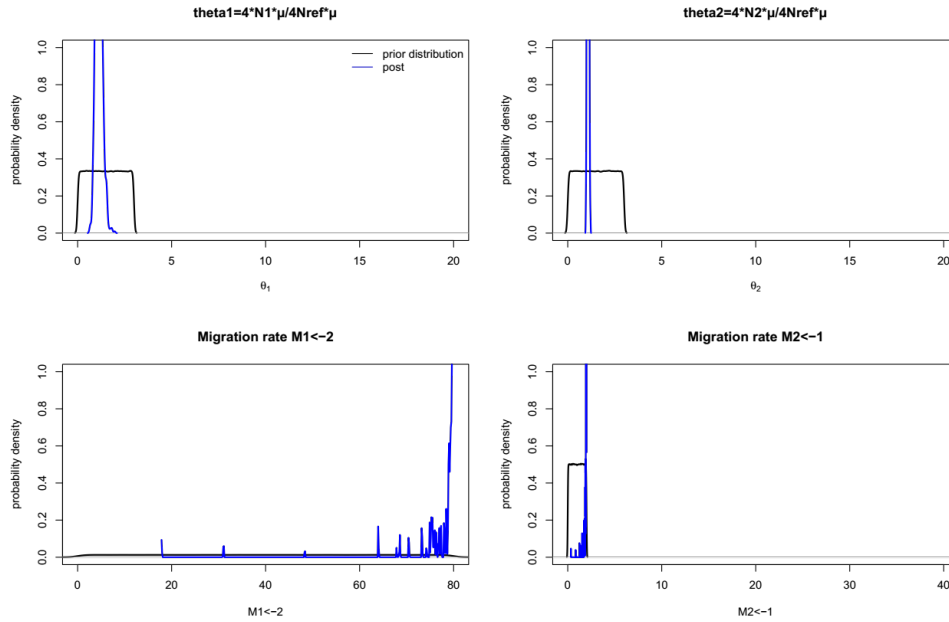

**Figure S6: Parameter estimates under the demographic model using constrained prior on  $N_1$ ,  $N_2$  and  $M_{21}$  based on the previously inferred parameters. Prior on  $M_{1 \leftarrow 2}$  was set to twice its previous value.**

The second round of parameter estimation also provides unambiguous evidence for higher downstream directed migration than the reverse. Indeed, the ratio  $M_{1 \leftarrow 2} / M_{2 \leftarrow 1}$  indicates that a 40 times higher downstream directed migration. We therefore suggest that setting the upper bound to higher value would lead to still higher estimates, suggesting that overall, the model may converge to a model of panmixia. From this inference we conclude that 1) populations are highly connected, 2) connectivity is due to downstream biased dispersal, as expected from theory and 3) the population show only minor deviation from panmixia. From a conservation perspective, we suggest that maintaining high connectivity among localities is the best way to maintain genetic diversity.

## 2. Measurement of the divergence time under a model of Strict Isolation

### a) Motivation

Observed patterns of genetic differentiation ( $F_{st}$ ) were strong between several isolated lakes. A closer look at the data indicates low levels of polymorphism, and that most of the variation was still shared between lakes. This raise the trivial question of whether strong differentiation and strong structure are due to a long time of divergence or other processes (bottlenecks, small population size). Addressing this question allows formulating further working hypothesis related to the probabilities of accumulating genetic incompatibilities or to display outbreeding depression or not.

Here, we tackle this question by studying a model of evolutionary divergence between the two lakes initially used for stocking, namely Pigeon lake and Chautauqua. In this case, the lakes are separate by a large distance (see Fig 1) and we make the assumption that there is no ongoing gene flow possible. Therefore, we used a simplified model of strict isolation to estimate the divergence time of these two populations. It is obvious that any initial gene flow should delay the speed of divergence.

In a second analysis, we wanted to verify if the St. Lawrence have diverged more or less at the same time than the two initially compared lakes. To do so we randomly picked sites from within the St. Lawrence (we chose sites with approximately similar numbers of individuals) and compared them to the lakes. We hypothesized that if the St. Lawrence (or its tributaries) diverged at the same time than other lakes, this would provide support for a single divergence event, perhaps due to recolonization of the area after some geological events. Under this scenario, the colonization of the smallest lake by few individuals can explain their lower genetic diversity.

### b) Model and coalescent simulations

The strict isolation (SI) model was used for coalescent simulations. This model is characterized by the instantaneous split (at time  $T_{split}$ ) of an ancestral population of size  $N_{anc}$  into two daughter population of size  $N_1$  and  $N_2$ . There is no subsequent gene flow between the population. Population size can vary at the split time so that the daughter population may undergo a bottleneck at this particular moment.

The same procedure as above was used: Prior for effective population size were uniformly distributed on the interval [0 – 1,000,000] individuals. These were sampled independently for each sub-population and for the ancestral populations.

Prior for Tsplit was sampled on the interval [0-6,000,000] generations. Priors were generated with a modified version of priorgen (Ross-Ibarra, 2008), recoded in Python.

Coalescent simulations were performed in msnsam with Nref set to 50,000.

We set the mutation rate  $\mu$  to  $1 \times 10^{-8}$  bp/generation, following many others (e.g. Barrio et al. 2016; Tine et al. 2014; Rougeux et al. 2017). Therefore we set  $\theta = 4N_{\text{ref}} \mu L$  to 0.16. Here L is the length of the RAD loci (80 pb).

The impact of arbitrary chosen mutation rate is discussed recently in (Brock & Wagner, 2018).

Here, to verify how different mutation rates would affect our conclusions, we also run the simulation pipeline by fixing a mutation rate 5 times lower (i.e.  $\mu = 2 \times 10^{-9}$  bp/generation translating into  $\theta = 0.032$ ) corresponding to the lowest estimates of  $\mu$  in vertebrates, namely the Atlantic herring (Feng et al., 2017). An intermediate mutation rate produces similar results and we provide below only the estimates for these two extremes.

The analysis was replicated 5 times but comparing one randomly chosen site from within the St. Lawrence to either Pigeon lake or Chautauqua lake. This allowed us to test if all populations approximately have split simultaneously.

### c) ABC parameter estimation

One million coalescent simulations were generated and associated summary statistics were computed using mscal (Roux et al. 2011) for each small sequence. The summary statistics are the same as in Rougemont & Bernatchez (2018) and are described above. The exact same procedure for parameter estimation was used. All scripts to exactly reproduce the results are available on github.

### d) Results

#### 1) Comparison between stocking sources: Chautauqua and Pigeon lake

The posterior distribution of parameters was very well differentiated from the prior distribution for the divergence time and ancestral population size parameter, resulting in narrow credible intervals (Fig S7). The descending population sizes were less accurately estimated and we do not interpret them.

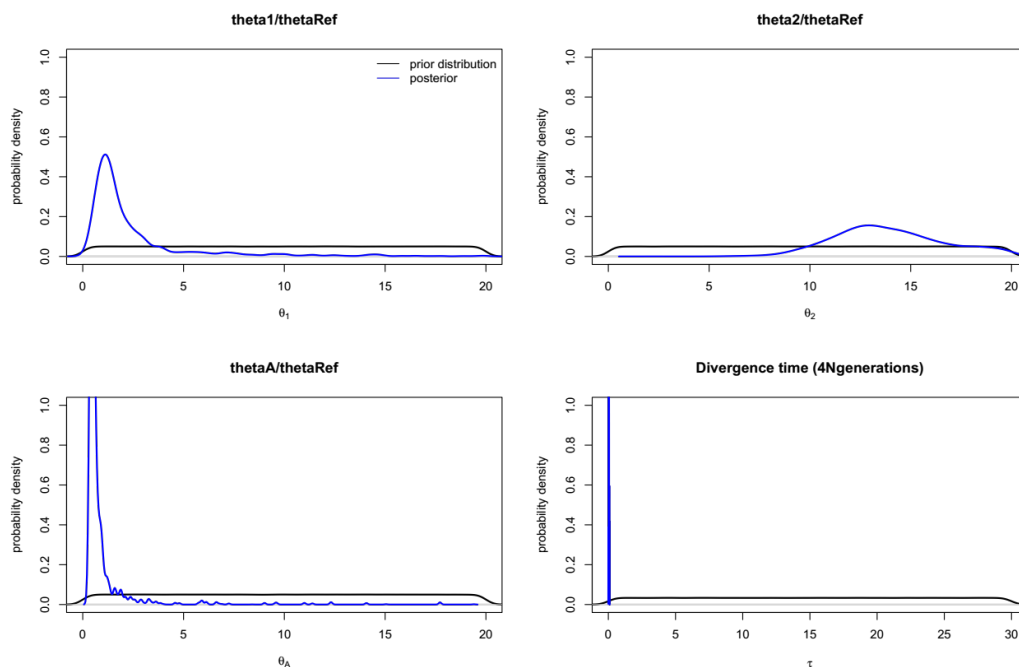

**Figure S7: Posterior distribution of parameter estimates under a model of strict isolation between Chautauqua and Pigeon lake.**

$\Theta_1$  = scaled effective population size of Pigeon lake ( $4N_1\mu/N_{\text{ref}}\mu$ )

$\Theta_2$  = scaled effective population size of Chautauqua lake ( $4N_2\mu/N_{\text{ref}}\mu$ )

$\Theta_A$  = scaled ancestral effective population size ( $4N_A\mu/N_{\text{ref}}\mu$ )

$\tau$  = Tsplit/(4Nref) scaled divergence time.

Prior distribution of the parameter is displayed in black and the posterior distribution is in blue.

In this case, under the hypothetical mutation rate, we obtain a median divergence time of 22,000 years [95%CI = 10,000 – 45,000] years.

To test the influence of the mutation rate, we run the coalescent simulation with  $\theta_{ref} = 0.032$ . Parameter estimates were not informative for the daughter population but only for the ancestral population and for the divergence time (Figure S8):

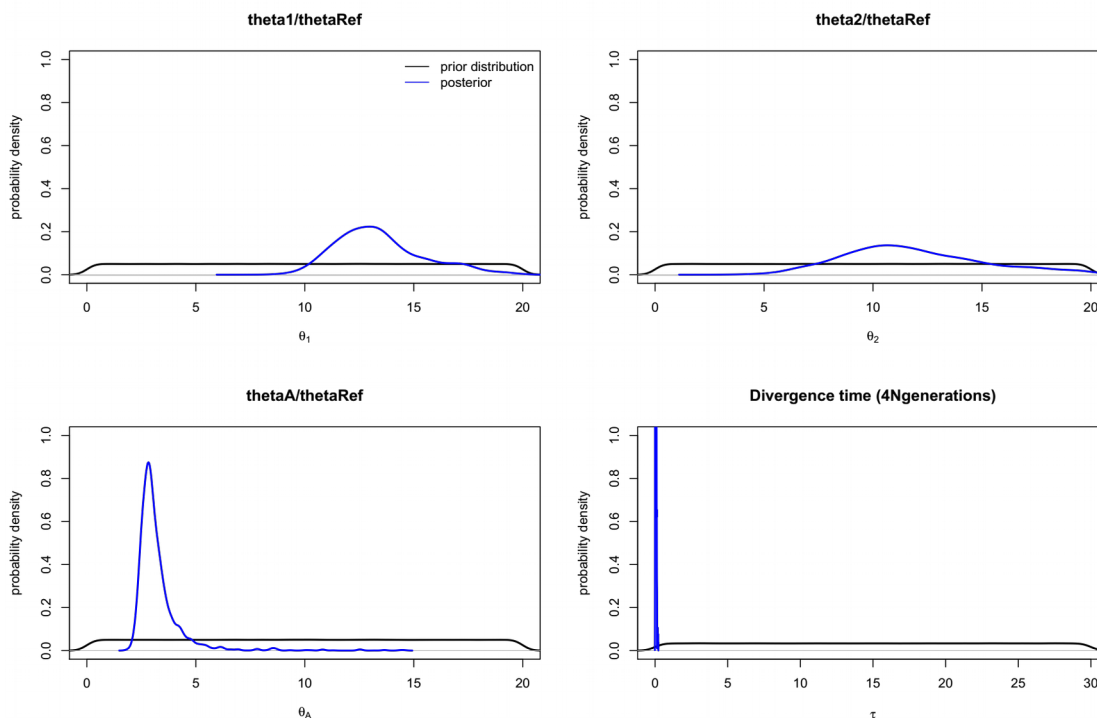

**Figure S8: Estimated divergence time using a 5 times smaller mutation rate in the coalescent simulations.**

$\Theta_1$  = scaled effective population size of Pigeon lake ( $4N_1\mu/N_{ref}\mu$ )

$\Theta_2$  = scaled effective population size of Chautauqua lake ( $4N_2\mu/N_{ref}\mu$ )

$\Theta_A$  = scaled ancestral effective population size ( $4N_1\mu/N_{ref}\mu$ )

$\tau$  =  $T_{split}/(4N_{ref})$  scaled divergence time.

Prior distribution of the parameter is displayed in black and the posterior distribution is in blue.

In this case, converting the divergence time yield a median  $T_{split} = 26,000$  [7,000 – 70,000] years.

Each analyses using sampling sites from the St. Lawrence yielded similarly very accurate posterior distribution of the split time ( $\tau$ ) with a minimum median value of 10,700 years [CI = 4,550 – 17000] and a maximum value of 19,040 [95%CI = 8,800 – 29,610] years.

The posterior distribution of parameter value for each compared population is provided in the table below. The posterior distribution of the parameter relative to the prior is also provided in the Figures below for each pairs of populations.

**Table S4:** Parameters estimates for each pairs of compared sites. Abbreviation of the sampling site are given in table 1.  $N_1, N_2$  and  $N_a$  are the respective effective population size of population 1 population 2 and ancestral population.  $T_{split}$  is the time of divergence. 95% Credible Intervals are given in brackets.

| pop1 | pop2 | $N_1$ [95%CI]             | $N_2$ [95%CI]             | $N_a$ [95%CI]           | $T_{split}$ [95%CI]    |
|------|------|---------------------------|---------------------------|-------------------------|------------------------|
| LSF  | CHQ  | 221425 [82840 -- 877540]  | 210435 [84420 -- 902680]  | 22955 [13765 -- 173305] | 15400 [6500 -- 24300]  |
| ONT  | CHQ  | 72543 [23906 -- 624831]   | 682064 [459594 -- 974402] | 26174 [15772 -- 192508] | 22925 [10097 -- 45688] |
| LSP  | CHQ  | 481555 [259325 -- 956745] | 162190 [73725 -- 738125]  | 19700 [13540 -- 124335] | 17500 [8500 -- 25800]  |
| ONT  | LSF  | 198185 [88606 -- 807925]  | 485464 [259816 -- 945909] | 11394 [7359 -- 90519]   | 17967 [10429 -- 25575] |
| ONT  | MSG  | 291165 [78978 -- 906731]  | 883355 [597543 -- 997576] | 20516 [13076 -- 144742] | 18385 [6904 -- 31455]  |
| LSL  | CHQ  | 415680 [176285 -- 960540] | 72280 [25755 -- 631380]   | 19400 [12390 -- 120585] | 19300 [9400 -- 31200]  |
| TRA  | LSF  | 24834 [11879 -- 124296]   | 690383 [454062 -- 975493] | 12240 [9093 -- 57088]   | 15975 [8285 -- 25267]  |
| MAU  | LSF  | 108610 [38430 -- 798615]  | 268575 [100410 -- 916210] | 30085 [18850 -- 290270] | 27200 [12700 -- 42300] |
| MAU  | LSP  | 66440 [14770 -- 758395]   | 342890 [107870 -- 963360] | 26085 [18380 -- 173160] | 13700 [7700 -- 20900]  |

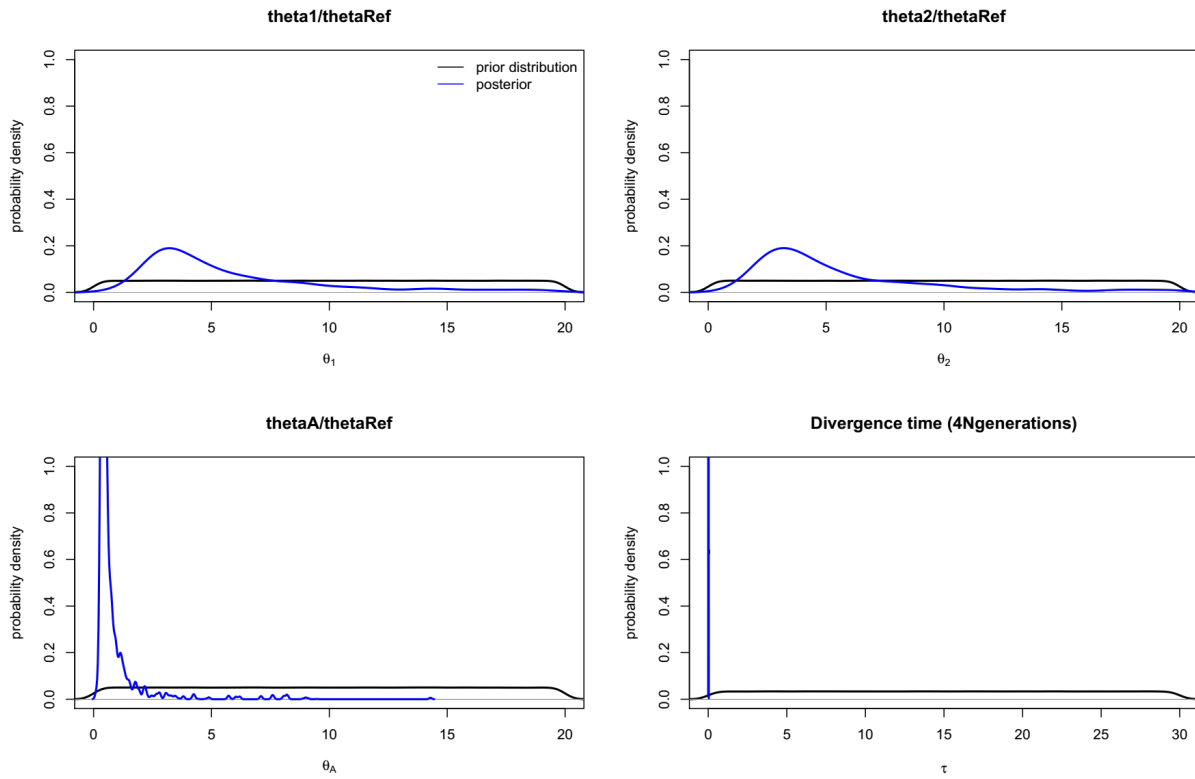

**Figure S9: Estimated divergence time between St. Francis lake and Chautauqua lake.**

$\Theta_1$  = scaled effective population size of St. Francis lake ( $4N_1\mu/N_{ref}\mu$ )

$\Theta_2$  = scaled effective population size of Chautauqua lake ( $4N_2\mu/N_{ref}\mu$ )

$\Theta_A$  = scaled ancestral effective population size ( $4N_A\mu/N_{ref}\mu$ )

$\tau$  =  $T_{split}/(4N_{ref})$  scaled divergence time.

Prior distribution of the parameter is displayed in black and the posterior distribution is in blue.

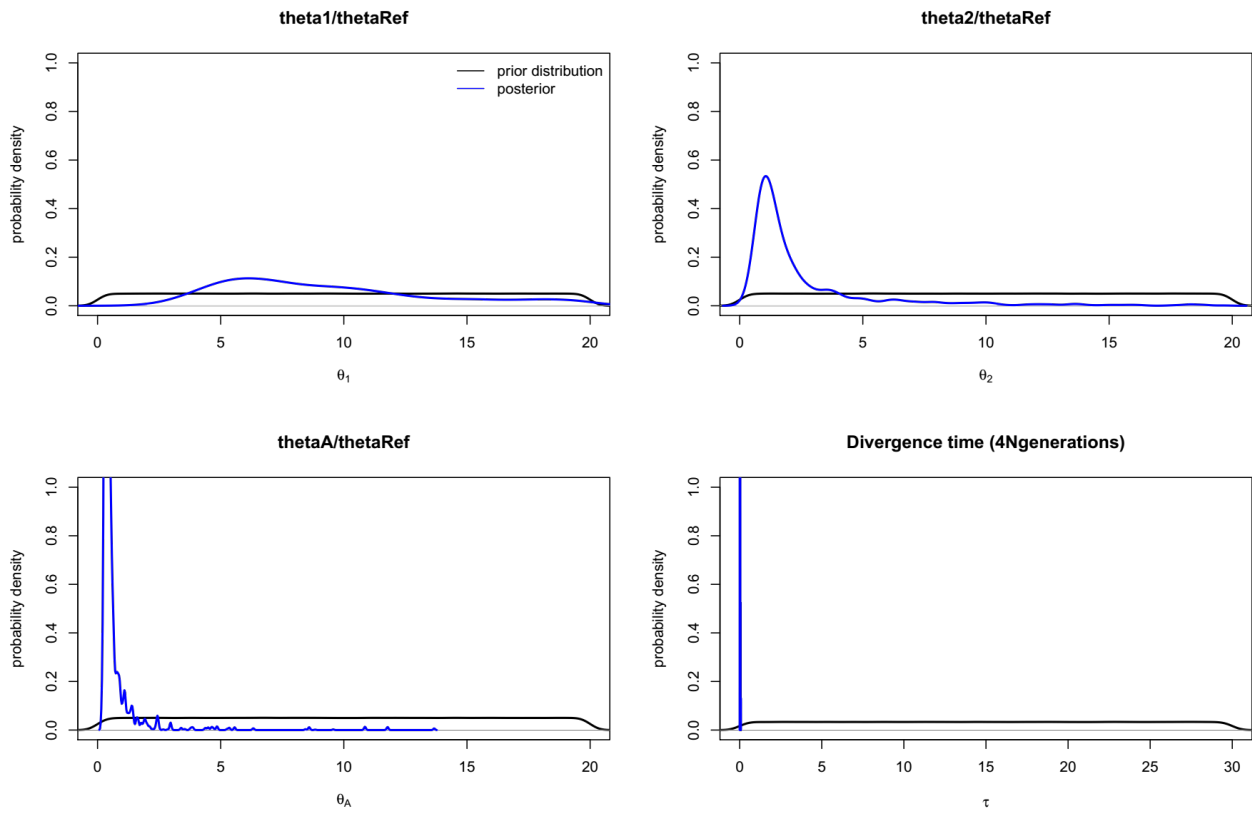

**Figure S10: Estimated divergence time between St. Louis lake and Chautauqua lake.**

$\Theta_1$  = scaled effective population size of St. Louis lake ( $4N_1\mu/N_{ref}\mu$ )

$\Theta_2$  = scaled effective population size of Chautauqua lake ( $4N_2\mu/N_{ref}\mu$ )

$\Theta_A$  = scaled ancestral effective population size ( $4N_1\mu/N_{ref}\mu$ )

$\tau$  =  $T_{split}/(4N_{ref})$  scaled divergence time.

Prior distribution of the parameter is displayed in black and the posterior distribution is in blue.

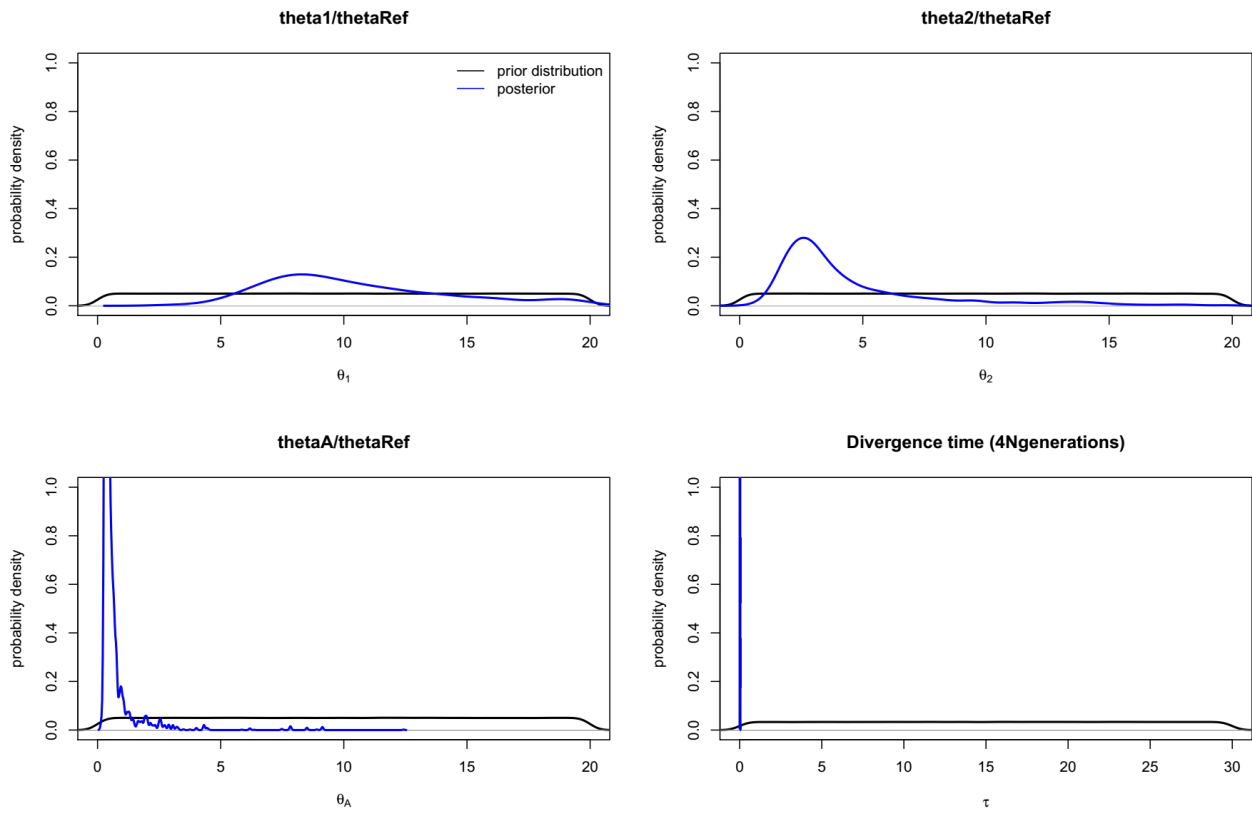

**Figure S11: Estimated divergence time between St. Pierre lake and Chautauqua lake.**

$\Theta_1$  = scaled effective population size of St. Pierre lake ( $4N_1\mu/N_{ref}\mu$ )

$\Theta_2$  = scaled effective population size of Chautauqua lake ( $4N_2\mu/N_{ref}\mu$ )

$\Theta_A$  = scaled ancestral effective population size ( $4N_A\mu/N_{ref}\mu$ )

$\tau$  =  $T_{split}/(4N_{ref})$  scaled divergence time.

Prior distribution of the parameter is displayed in black and the posterior distribution is in blue.



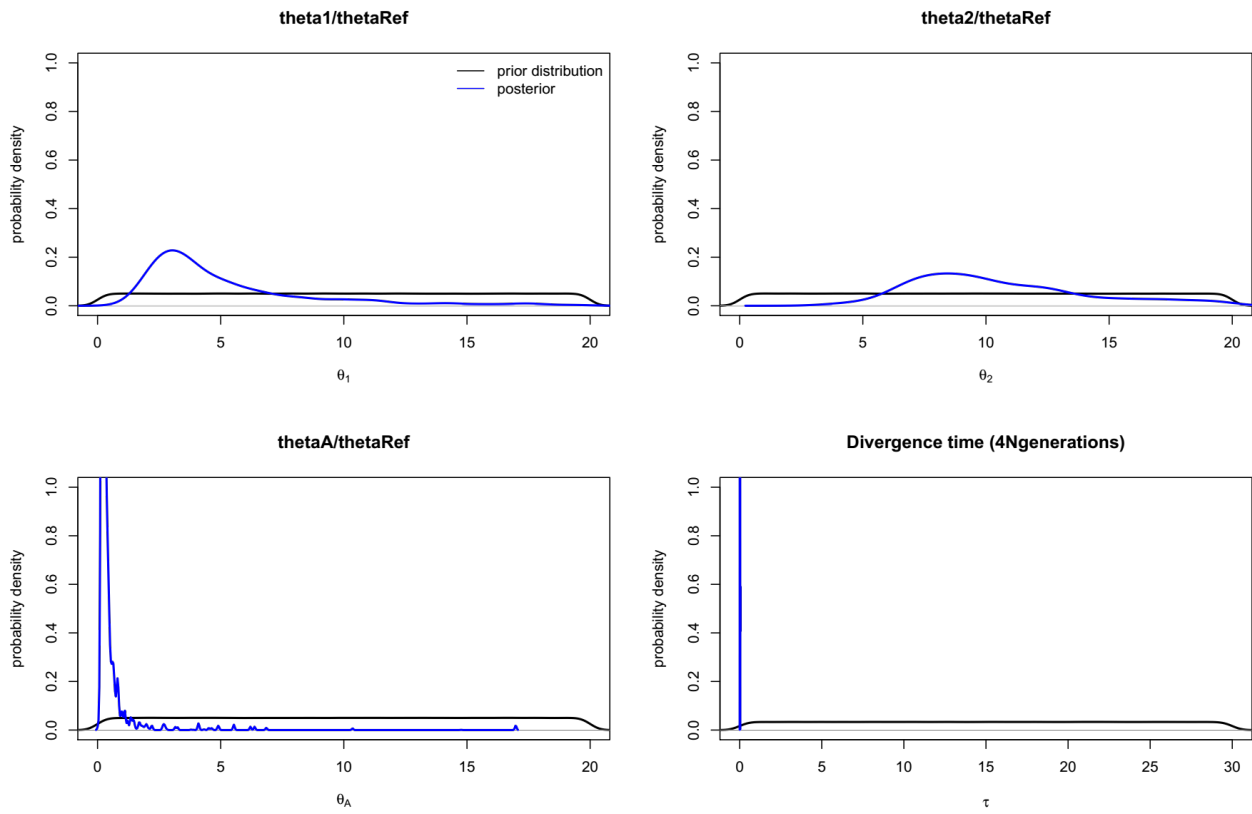

**Figure S12: Estimated divergence time between Pigeon lake and St. Francis lake.**

$\Theta_1$  = scaled effective population size of Pigeon lake ( $4N_1\mu/N_{ref}\mu$ )

$\Theta_2$  = scaled effective population size of St. Francis lake ( $4N_2\mu/N_{ref}\mu$ )

$\Theta_A$  = scaled ancestral effective population size ( $4N_A\mu/N_{ref}\mu$ )

$\tau$  =  $T_{split}/(4N_{ref})$  scaled divergence time.

Prior distribution of the parameter is displayed in black and the posterior distribution is in blue.

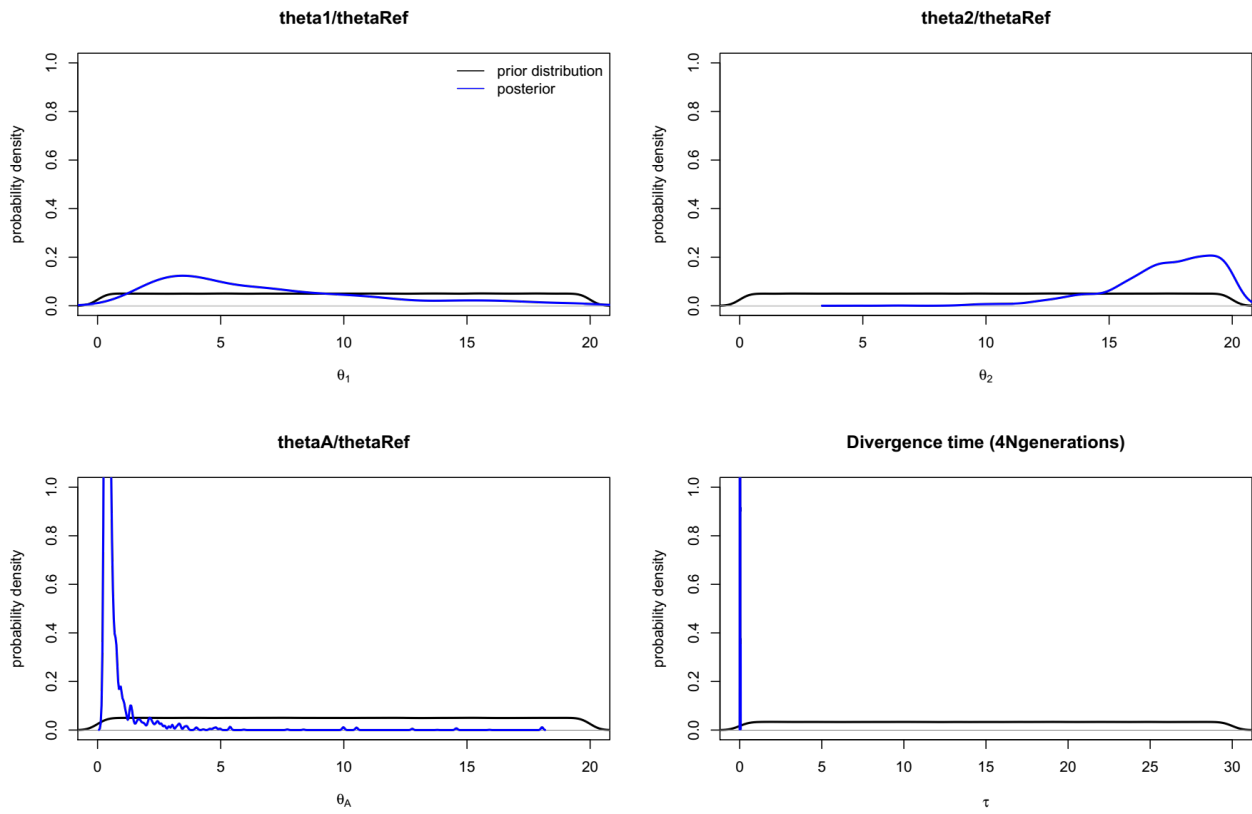

**Figure S13: Estimated divergence time between Pigeon lake and Montreal sorel.**

$\Theta_1$  = scaled effective population size of Pigeon lake ( $4N_1\mu/N_{ref}\mu$ )

$\Theta_2$  = scaled effective population size of Montreal sorel ( $4N_2\mu/N_{ref}\mu$ )

$\Theta_A$  = scaled ancestral effective population size ( $4N_1\mu/N_{ref}\mu$ )

$\tau$  =  $T_{split}/(4N_{ref})$  scaled divergence time.

Prior distribution of the parameter is displayed in black and the posterior distribution is in blue.

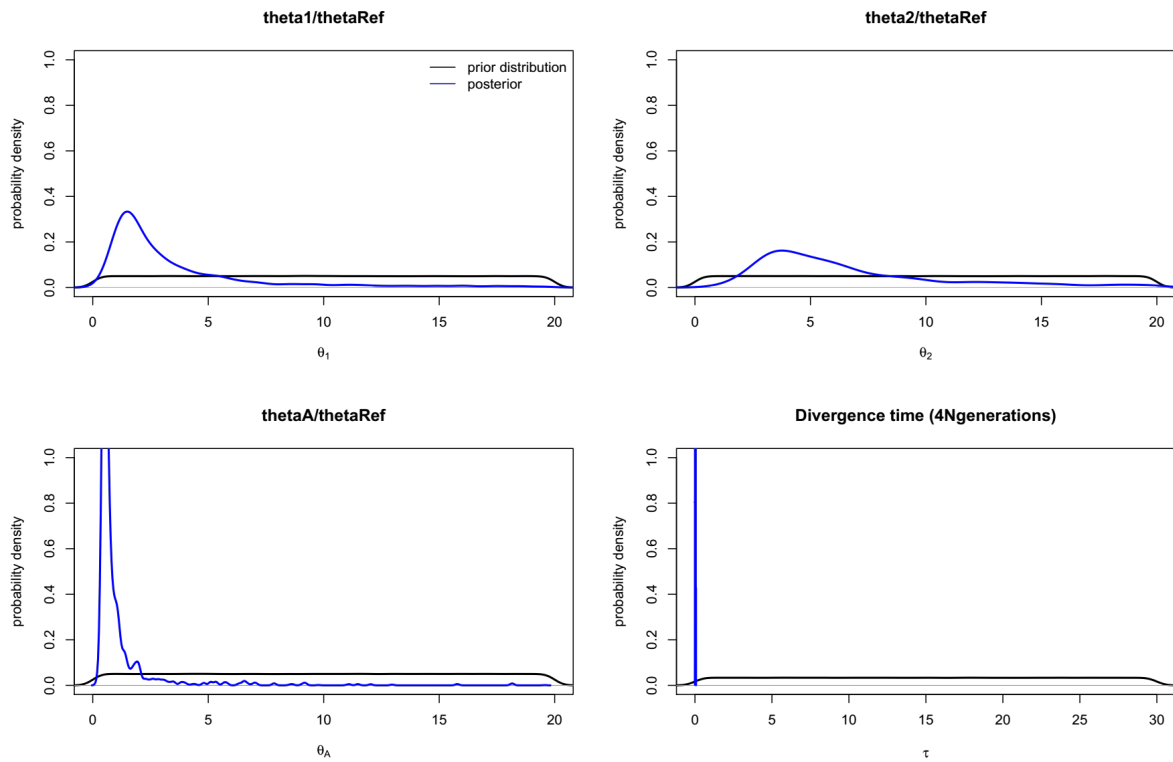

**Figure S14: Estimated divergence time between St. Maurice river and St. Francis lake.**

$\Theta_1$  = scaled effective population size of St. Maurice lake ( $4N_1\mu/N_{ref}\mu$ )

$\Theta_2$  = scaled effective population size of St. Francis lake ( $4N_2\mu/N_{ref}\mu$ )

$\Theta_A$  = scaled ancestral effective population size ( $4N_A\mu/N_{ref}\mu$ )

$\tau$  =  $T_{split}/(4N_{ref})$  scaled divergence time.

Prior distribution of the parameter is displayed in black and the posterior distribution is in blue.

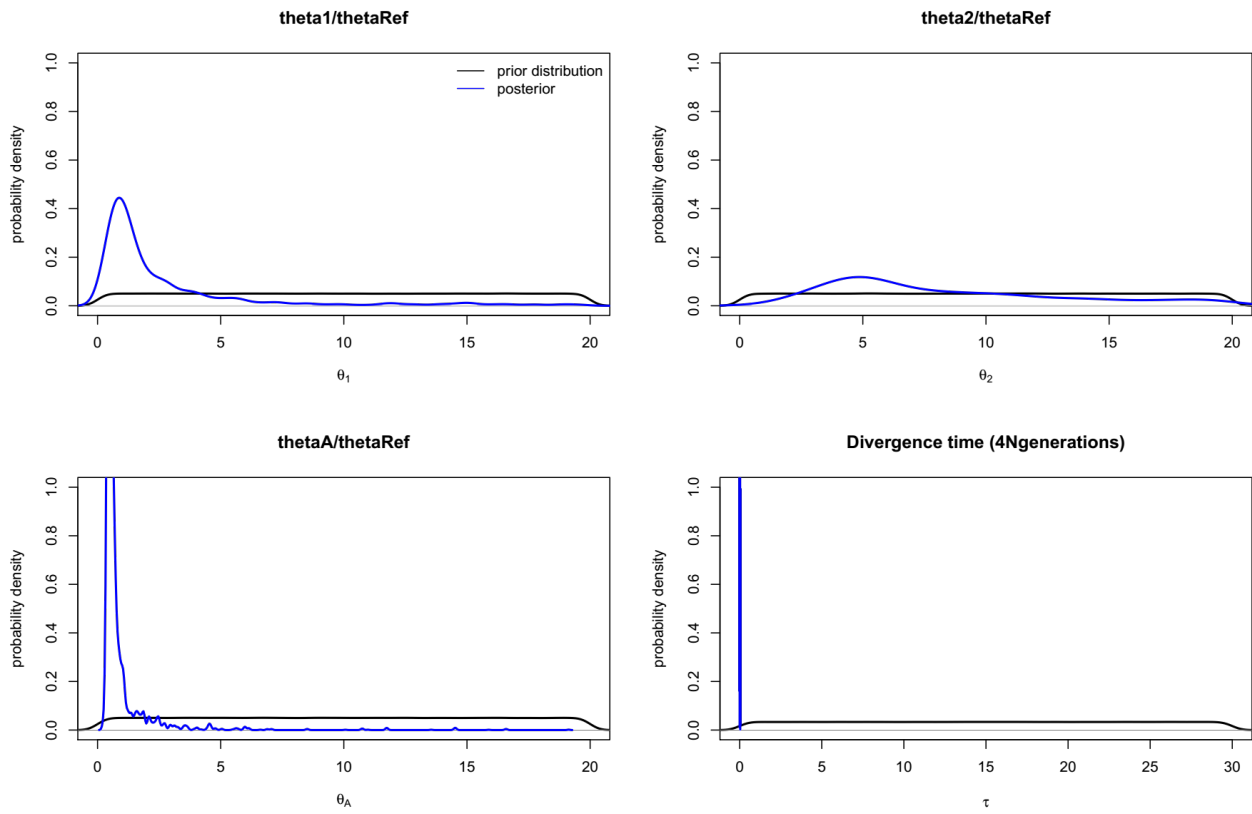

**Figure S15: Estimated divergence time between st. Maurice river and St. Pierre lake.**

$\Theta_1$  = scaled effective population size of St. Maurice river ( $4N_1\mu/N_{Ref}\mu$ )

$\Theta_2$  = scaled effective population size of St. Pierre lake ( $4N_2\mu/N_{ref}\mu$ )

$\Theta_A$  = scaled ancestral effective population size ( $4N_1\mu/N_{ref}\mu$ )

$\tau$  =  $T_{split}/(4N_{ref})$  scaled divergence time.

Prior distribution of the parameter is displayed in black and the posterior distribution is in blue.

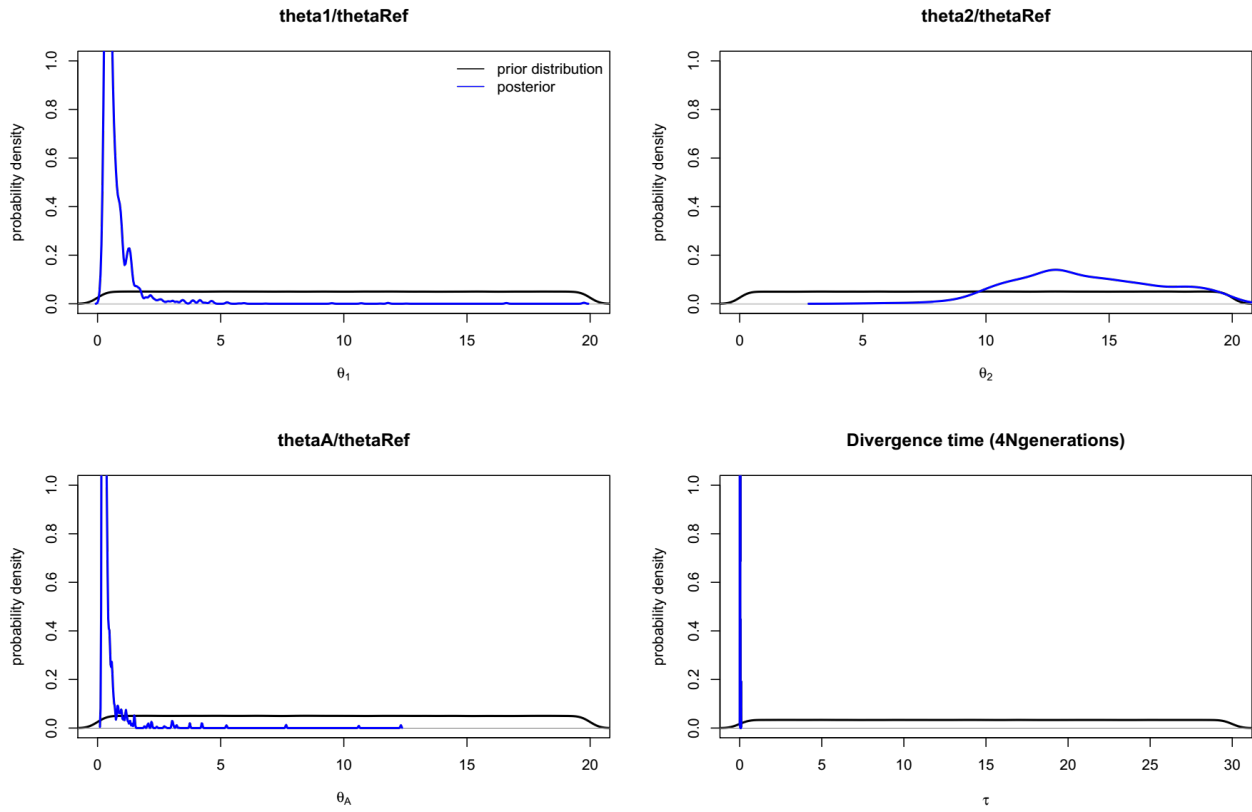

**Figure S16: Estimated divergence time between st. Maurice river and St. Pierre lake.**

$\Theta_1$  = scaled effective population size of St. Maurice river ( $4N_1\mu/N_{ref}\mu$ )

$\Theta_2$  = scaled effective population size of St. Pierre lake ( $4N_2\mu/N_{ref}\mu$ )

$\Theta_A$  = scaled ancestral effective population size ( $4N_A\mu/N_{ref}\mu$ )

$\tau$  =  $T_{split}/(4N_{ref})$  scaled divergence time.

Prior distribution of the parameter is displayed in black and the posterior distribution is in blue.

## e) Discussion & limits

Estimates of divergence time were congruent across each pair of population tested. On the contrary we failed to estimate contemporary population sizes (N1 and N2) in most of the cases.

These estimates are based on assumption regarding the mutation rate that affect more or less our biological estimates. Reassuringly, estimates performed using two different mutation rate still resulted in overlapping 95% credible intervals. Regardless of the mutation rate that affect all our models in the same way, it is likely that all populations have started to diverged simultaneously, for instance at the end of the last glacial event, when the many meters of ice started to melt. At this time, individuals may have been able to invade the water from Quebec, resulting in the establishment (and divergence) of these recent populations.

## References:

- Barrio, A. M., Lamichhaney, S., Fan, G., Rafati, N., Pettersson, M., Zhang, H., ... Andersson, L. (2016). The genetic basis for ecological adaptation of the Atlantic herring revealed by genome sequencing. *ELife*, 5, e12081. <https://doi.org/10.7554/eLife.12081>
- Brock, C. D., & Wagner, C. E. (2018). The smelly path to sympatric speciation? *Molecular Ecology*, 27(21), 4153-4156. <https://doi.org/10.1111/mec.14845>
- Csilléry, K., François, O., & Blum, M. G. B. (2012). abc: an R package for approximate Bayesian computation (ABC). *Methods in Ecology and Evolution*, 3(3), 475-479. <https://doi.org/10.1111/j.2041-210X.2011.00179.x>
- Fagundes, N. J. R., Ray, N., Beaumont, M., Neuenchwander, S., Salzano, F. M., Bonatto, S. L., & Excoffier, L. (2007). Statistical evaluation of alternative models of human evolution. *Proceedings of the National Academy of Sciences*, 104(45), 17614-17619. <https://doi.org/10.1073/pnas.0708280104>
- Feng, C., Pettersson, M., Lamichhaney, S., Rubin, C.-J., Rafati, N., Casini, M., ... Andersson, L. (2017). Moderate nucleotide diversity in the Atlantic herring is associated with a low mutation rate. *eLife*, 6, e23907. <https://doi.org/10.7554/eLife.23907>
- Hudson, R. R. (2002). Generating samples under a Wright-Fisher neutral model of genetic variation. *Bioinformatics (Oxford, England)*, 18(2), 337-338.
- Nei, M., Kumar, S. (2000). *Molecular Evolution and Phylogenetics*. Oxford University Press: New York.
- Ross-Ibarra, J., Wright, S. I., Foxe, J. P., Kawabe, A., DeRose-Wilson, L., Gos, G., ... Gaut, B. S. (2008). Patterns of Polymorphism and Demographic History in Natural Populations of *Arabidopsis lyrata*. *PLoS ONE*, 3(6), e2411. <https://doi.org/10.1371/journal.pone.0002411>
- Rougemont, Q., & Bernatchez, L. (2018). The demographic history of Atlantic salmon (*Salmo salar*) across its distribution range reconstructed from approximate Bayesian computations\*. *Evolution*, 72(6), 1261-1277. <https://doi.org/10.1111/evo.13486>

- Rougeux, C., Bernatchez, L., & Gagnaire, P.-A. (2017). Modeling the Multiple Facets of Speciation-with-Gene-Flow toward Inferring the Divergence History of Lake Whitefish Species Pairs (*Coregonus clupeaformis*). *Genome Biology and Evolution*, *9*(8), 2057-2074. <https://doi.org/10.1093/gbe/evx150>
- Roux, C., Tsagkogeorga, G., Bierne, N., & Galtier, N. (2013). Crossing the Species Barrier: Genomic Hotspots of Introgression between Two Highly Divergent *Ciona intestinalis* Species. *Molecular Biology and Evolution*, *30*(7), 1574-1587. <https://doi.org/10.1093/molbev/mst066>
- Roux, Camille, Castric, V., Pauwels, M., Wright, S. I., Saumitou-Laprade, P., & Vekemans, X. (2011). Does Speciation between *Arabidopsis halleri* and *Arabidopsis lyrata* Coincide with Major Changes in a Molecular Target of Adaptation? *PLoS ONE*, *6*(11), e26872. <https://doi.org/10.1371/journal.pone.0026872>
- Roux, Camille, Fraïsse, C., Romiguier, J., Anciaux, Y., Galtier, N., & Bierne, N. (2016). Shedding Light on the Grey Zone of Speciation along a Continuum of Genomic Divergence. *PLoS Biology*, *14*(12), e2000234. <https://doi.org/10.1371/journal.pbio.2000234>
- Tajima, F. (1989). Statistical Method for Testing the Neutral Mutation Hypothesis by DNA Polymorphism. *Genetics*, *123*(3), 585-595.
- Tine, M., Kuhl, H., Gagnaire, P.-A., Louro, B., Desmarais, E., Martins, R. S. T., ... Reinhardt, R. (2014). European sea bass genome and its variation provide insights into adaptation to euryhalinity and speciation. *Nature Communications*, *5*. <https://doi.org/10.1038/ncomms6770>
